## Sex-Dependent Shared and Non-Shared Genetic Architecture

### Across Mood and Psychotic Disorders

Gabriëlla A. M. Blokland<sup>1,2,3,4</sup>, Jakob Grove<sup>5,6,7,8</sup>, Chia-Yen Chen<sup>2,9</sup>, Chris Cotsapas<sup>4,10,11</sup>, Stuart Tobet<sup>12,13</sup>, Robert Handa<sup>12,13</sup>, Schizophrenia Working Group of the Psychiatric Genomics Consortium<sup>14</sup>, David St Clair<sup>15</sup>, Todd Lencz<sup>16,17,18</sup>, Bryan J. Mowry<sup>19,20</sup>, Sathish Periyasamy<sup>19,21</sup>, Murray J. Cairns<sup>22,23,24</sup>, Paul A. Tooney<sup>23,24,25</sup>, Jing Qin Wu<sup>23,25</sup>, Brian Kelly<sup>24</sup>, George Kirov<sup>26</sup>, Patrick F. Sullivan<sup>27,28,29</sup>, Aiden Corvin<sup>30</sup>, Brien P. Riley<sup>31</sup>, Tõnu Esko<sup>4,32,33,111</sup>, Lili Milani<sup>32</sup>, Erik G. Jönsson<sup>34,35</sup>, Aarno Palotie<sup>2,4,36</sup>, Hannelore Ehrenreich<sup>37</sup>, Martin Begemann<sup>37</sup>, Agnes Steixner-Kumar<sup>37</sup>, Pak C. Sham<sup>38,39,40</sup>, Nakao Iwata<sup>41</sup>, Daniel R. Weinberger<sup>42,43</sup>, Pablo V. Gejman<sup>44,45</sup>, Alan R. Sanders<sup>44,45</sup>, Joseph D. Buxbaum<sup>46,47,48,49</sup>, Dan Rujescu<sup>50,51</sup>, Ina Giegling<sup>50,51</sup>, Bettina Konte<sup>50</sup>, Annette M. Hartmann<sup>50</sup>, Elvira Bramon<sup>52</sup>, Robin M. Murray<sup>53</sup>, Michele T. Pato<sup>54,55</sup>, Jimmy Lee<sup>56,57</sup>, Ingrid Melle<sup>58</sup>, Espen Molden<sup>59,60</sup>, Roel A. Ophoff<sup>61,62,63</sup>, Andrew McQuillin<sup>64</sup>, Nicholas J. Bass<sup>64</sup>, Rolf Adolfsson<sup>65</sup>, Anil K. Malhotra<sup>16,17,18</sup>, Bipolar Disorder Working Group of the Psychiatric Genomics Consortium<sup>14</sup>, Nicholas G. Martin<sup>66,67</sup>, Janice M. Fullerton<sup>68,69</sup>, Philip B. Mitchell<sup>70</sup>, Peter R. Schofield<sup>68,69</sup>, Andreas J. Forstner<sup>71,72</sup>, Franziska Degenhardt<sup>72,73</sup>, Sabrina Schaupp<sup>74</sup>, Ashley L. Comes<sup>74,75</sup>, Manolis Kogevinas<sup>76</sup>, José Guzman-Parra<sup>77</sup>, Andreas Reif<sup>78</sup>, Fabian Streit<sup>79</sup>, Lea Sirignano<sup>79</sup>, Sven Cichon<sup>72,80,81,82</sup>, Maria Grigoriou-Serbanescu<sup>83</sup>, Joanna Hauser<sup>84</sup>, Jolanta Lissowska<sup>85</sup>, Fermin Mayoral<sup>77</sup>, Bertram Müller-Myhsok<sup>86,87,88</sup>, Beata Świątkowska<sup>89</sup>, Thomas G. Schulze<sup>74,79,90,91,92</sup>, Markus M. Nöthen<sup>72</sup>, Marcella Rietschel<sup>79</sup>, John Kelsoe<sup>93</sup>, Marion Leboyer<sup>94,95,96</sup>, Stéphane Jamain<sup>94,97</sup>, Bruno Etain<sup>95,98,99,100</sup>, Frank Bellivier<sup>95,98,99,101</sup>, John B. Vincent<sup>102</sup>, Martin Alda<sup>103,104</sup>, Claire O'Donovan<sup>103</sup>, Pablo Cervantes<sup>105</sup>, Joanna M. Biernacka<sup>106</sup>, Mark Frye<sup>107</sup>, Susan L. McElroy<sup>108</sup>, Laura J. Scott<sup>109</sup>, Eli A. Stahl<sup>47,110,111</sup>, Mikael Landén<sup>27,112</sup>, Marian L. Hamshere<sup>26</sup>, Olav B. Smeland<sup>58</sup>, Srdjan Djurovic<sup>113,114</sup>, Arne E. Vaaler<sup>115,116</sup>, Ole A. Andreassen<sup>58</sup>, Major Depressive Disorder Working Group of the Psychiatric Genomics Consortium<sup>14</sup>, Bernhard T. Baune<sup>117,118,119</sup>, Tracy Air<sup>120</sup>, Martin Preisig<sup>121</sup>, Rudolf Uher<sup>103</sup>, Douglas F. Levinson<sup>122</sup>, Myrna M. Weissman<sup>123,124</sup>, James B. Potash<sup>125</sup>, Jianxin Shi<sup>126</sup>, James A. Knowles<sup>127</sup>, Roy H. Perlis<sup>2,3,4</sup>, Susanne Lucae<sup>86,128</sup>, Dorret I. Boomsma<sup>129,130</sup>, Brenda W. J. H. Penninx<sup>131</sup>, Jouke-Jan Hottenga<sup>129,130</sup>, Eco J. C. de Geus<sup>129,130</sup>, Gonneke Willemsen<sup>129,130</sup>, Yuri Milaneschi<sup>131</sup>, Henning Tiemeier<sup>132</sup>, Hans J. Grabe<sup>133</sup>, Alexander Teumer<sup>134</sup>, Sandra Van der Auwera<sup>133</sup>, Uwe Völker<sup>135</sup>, Steven P. Hamilton<sup>136</sup>, Patrik K. E. Magnusson<sup>27</sup>, Alexander Viktorin<sup>27</sup>, Divya Mehta<sup>137</sup>, Niamh Mullins<sup>110,138,139</sup>, Mark J. Adams<sup>140</sup>, Gerome Breen<sup>141</sup>, Andrew M. McIntosh<sup>140,142</sup>, Cathryn M. Lewis<sup>143</sup>, Sex Differences Cross-Disorder Analysis Group of the Psychiatric Genomics Consortium<sup>14</sup>, The Lundbeck Foundation Initiative for Integrative Psychiatric Research (iPSYCH)<sup>14</sup>, David M. Hougaard<sup>6,144</sup>, Merete Nordentoft<sup>6,145,146</sup>, Ole Mors<sup>6,147</sup>, Preben B. Mortensen<sup>6,148,149,150</sup>, Thomas Werge<sup>6,146,151</sup>, Thomas D. Als<sup>5,6,7</sup>, Anders D. Børghlum<sup>5,6,7</sup>, Tracey L. Petryshen<sup>2,3,4,152</sup>, Jordan W. Smoller<sup>2,3,4</sup>, Jill M. Goldstein<sup>13,153,154,155</sup>

<sup>1</sup>Department of Psychiatry and Neuropsychology, School for Mental Health and Neuroscience, Faculty of Health, Medicine and Life Sciences, Maastricht University, Maastricht, The Netherlands

<sup>2</sup>Psychiatric and Neurodevelopmental Genetics Unit, Department of Psychiatry and Center for Genomic Medicine, Massachusetts General Hospital, Boston, Massachusetts, USA

<sup>3</sup>Department of Psychiatry, Harvard Medical School, Boston, Massachusetts, USA

<sup>4</sup>Stanley Center for Psychiatric Research, Broad Institute of MIT and Harvard, Cambridge, Massachusetts, USA

<sup>5</sup>Department of Biomedicine, Aarhus University, Aarhus, Denmark

- <sup>6</sup>The Lundbeck Foundation Initiative for Integrative Psychiatric Research (iPSYCH), Copenhagen, Denmark
- <sup>7</sup>Center for Genome Analysis and Personalized Medicine, Aarhus, Denmark
- <sup>8</sup>Bioinformatics Research Centre (BiRC), Aarhus, Denmark
- <sup>9</sup>Biogen Inc., Cambridge, Massachusetts, USA
- <sup>10</sup>Department of Neurology, Yale School of Medicine, New Haven, Connecticut, USA
- <sup>11</sup>Department of Genetics, Yale School of Medicine, New Haven, Connecticut, USA
- <sup>12</sup>Department of Biomedical Sciences, Colorado State University, Fort Collins, Colorado, USA
- <sup>13</sup>Innovation Center on Sex Differences in Medicine (ICON), Massachusetts General Hospital, Boston, Massachusetts, USA
- <sup>14</sup>See Acknowledgements for a full membership list and Supplemental Material for member affiliations
- <sup>15</sup>University of Aberdeen, Institute of Medical Sciences, Aberdeen, United Kingdom
- <sup>16</sup>The Feinstein Institute for Medical Research, Manhasset, New York, USA
- <sup>17</sup>The Zucker School of Medicine at Hofstra/Northwell, Hempstead, New York, USA
- <sup>18</sup>The Zucker Hillside Hospital, Glen Oaks, New York, USA
- <sup>19</sup>Queensland Brain Institute, The University of Queensland, Brisbane, Queensland, Australia
- <sup>20</sup>Queensland Centre for Mental Health Research, University of Queensland, Brisbane, Queensland, Australia
- <sup>21</sup>Queensland Centre for Mental Health Research, The Park - Centre for Mental Health, Wacol, Queensland, Australia
- <sup>22</sup>Schizophrenia Research Institute, Sydney, New South Wales, Australia
- <sup>23</sup>School of Biomedical Sciences and Pharmacy, University of Newcastle, Callaghan, New South Wales, Australia
- <sup>24</sup>Priority Centre for Translational Neuroscience and Mental Health, University of Newcastle, Newcastle, New South Wales, Australia
- <sup>25</sup>Schizophrenia Research Institute, Sydney, New South Wales, Australia
- <sup>26</sup>MRC Centre for Neuropsychiatric Genetics and Genomics, Institute of Psychological Medicine and Clinical Neurosciences, School of Medicine, Cardiff University, Cardiff, United Kingdom
- <sup>27</sup>Department of Medical Epidemiology and Biostatistics, Karolinska Institutet, Stockholm, Sweden
- <sup>28</sup>Department of Genetics, University of North Carolina at Chapel Hill, Chapel Hill, North Carolina, USA
- <sup>29</sup>Department of Psychiatry, University of North Carolina at Chapel Hill, Chapel Hill, North Carolina, USA
- <sup>30</sup>Neuropsychiatric Genetics Research Group, Department of Psychiatry, Trinity College Dublin, Dublin, Ireland
- <sup>31</sup>Virginia Institute for Psychiatric and Behavioral Genetics, Departments of Psychiatry and Human and Molecular Genetics, Virginia Commonwealth University, Richmond, Virginia, USA
- <sup>32</sup>Institute of Genomics, University of Tartu, Tartu, Estonia
- <sup>33</sup>Broad Institute of MIT and Harvard, Cambridge, Massachusetts, USA
- <sup>34</sup>Department of Clinical Neuroscience, Psychiatry Section, Karolinska Institutet, Stockholm, Sweden
- <sup>35</sup>Norwegian Centre for Mental Disorders Research (NORMENT), KG Jebsen Centre for Psychosis Research, Institute of Clinical Medicine, University of Oslo, Oslo, Norway
- <sup>36</sup>Institute for Molecular Medicine Finland, FIMM, University of Helsinki, Helsinki, Finland
- <sup>37</sup>Department of Clinical Neuroscience, Max Planck Institute of Experimental Medicine, Göttingen, Germany
- <sup>38</sup>Department of Psychiatry, Li Ka Shing Faculty of Medicine, The University of Hong Kong,

Hong Kong, SAR China

<sup>39</sup>State Key Laboratory for Brain and Cognitive Sciences, Li Ka Shing Faculty of Medicine, The University of Hong Kong, Hong Kong, SAR China

<sup>40</sup>Centre for Genomic Sciences, The University of Hong Kong, Hong Kong, SAR China

<sup>41</sup>Department of Psychiatry, Fujita Health University School of Medicine, Toyoake, Aichi, Japan

<sup>42</sup>Lieber Institute for Brain Development, Baltimore, Maryland, USA

<sup>43</sup>Departments of Psychiatry, Neurology, Neuroscience and Institute of Genetic Medicine, Johns Hopkins School of Medicine, Baltimore, Maryland, USA

<sup>44</sup>Department of Psychiatry and Behavioral Neuroscience, University of Chicago, Chicago, Illinois, USA

<sup>45</sup>Department of Psychiatry and Behavioral Sciences, North Shore University Health System, Evanston, Illinois, USA

<sup>46</sup>Department of Human Genetics, Icahn School of Medicine at Mount Sinai, New York, New York, USA

<sup>47</sup>Department of Psychiatry, Icahn School of Medicine at Mount Sinai, New York, New York, USA

<sup>48</sup>Friedman Brain Institute, Icahn School of Medicine at Mount Sinai, New York, New York, USA

<sup>49</sup>Department of Neuroscience, Icahn School of Medicine at Mount Sinai, New York, New York, USA

<sup>50</sup>Department of Psychiatry, University of Halle, Halle, Germany

<sup>51</sup>Department of Psychiatry, University of Munich, Munich, Germany

<sup>52</sup>Mental Health Neuroscience Research Department, Division of Psychiatry, Faculty of Brain Sciences, University College London, London, United Kingdom

<sup>53</sup>Institute of Psychiatry, King's College London, London, United Kingdom

<sup>54</sup>Department of Psychiatry and Zilkha Neurogenetics Institute, Keck School of Medicine at University of Southern California, Los Angeles, California, USA

<sup>55</sup>Institute for Genomic Health, SUNY Downstate Medical Center College of Medicine, Brooklyn, New York, USA

<sup>56</sup>Research Division and Department of General Psychiatry, Institute of Mental Health, Singapore, Singapore

<sup>57</sup>Duke-National University of Singapore Graduate Medical School, Singapore

<sup>58</sup>Norwegian Centre for Mental Disorders Research (NORMENT), Institute of Clinical Medicine, University of Oslo and Division of Mental Health and Addiction, Oslo University Hospital, Oslo, Norway

<sup>59</sup>Center for Psychopharmacology, Diakonhjemmet Hospital, Oslo, Norway

<sup>60</sup>Department of Pharmaceutical Biosciences, School of Pharmacy, University of Oslo, Norway

<sup>61</sup>Department of Human Genetics, David Geffen School of Medicine, University of California, Los Angeles, California, USA

<sup>62</sup>Center for Neurobehavioral Genetics, Semel Institute for Neuroscience and Human Behavior, University of California, Los Angeles, California, USA

<sup>63</sup>University Medical Center Utrecht, Department of Psychiatry, Rudolf Magnus Institute of Neuroscience, Utrecht, The Netherlands

<sup>64</sup>Molecular Psychiatry Laboratory, Division of Psychiatry, University College London, London, United Kingdom

<sup>65</sup>Department of Clinical Sciences, Psychiatry, Umeå University Medical Faculty, Umeå, Sweden

<sup>66</sup>Genetics and Computational Biology, QIMR Berghofer Medical Research Institute, Brisbane, Queensland, Australia

- <sup>67</sup>School of Psychology, The University of Queensland, Brisbane, Queensland, Australia
- <sup>68</sup>Neuroscience Research Australia, Sydney, New South Wales, Australia
- <sup>69</sup>School of Medical Sciences, University of New South Wales, Sydney, New South Wales, Australia
- <sup>70</sup>School of Psychiatry, University of New South Wales, Sydney, New South Wales, Australia
- <sup>71</sup>Centre for Human Genetics, University of Marburg, Marburg, Germany
- <sup>72</sup>Institute of Human Genetics, University of Bonn, School of Medicine & University Hospital Bonn, Bonn, Germany
- <sup>73</sup>Department of Child and Adolescent Psychiatry, Psychosomatics and Psychotherapy, University Hospital Essen, University of Duisburg-Essen, Duisburg, Germany
- <sup>74</sup>Institute of Psychiatric Phenomics and Genomics (IPPG), University Hospital, LMU Munich, Munich, Germany
- <sup>75</sup>International Max Planck Research School for Translational Psychiatry (IMPRS-TP), Munich, Germany
- <sup>76</sup>ISGlobal, Barcelona, Spain
- <sup>77</sup>Mental Health Department, University Regional Hospital, Biomedical Research Institute of Málaga (IBIMA), Málaga, Spain
- <sup>78</sup>Department of Psychiatry, Psychosomatic Medicine and Psychotherapy, University Hospital Frankfurt, Frankfurt am Main, Germany
- <sup>79</sup>Department of Genetic Epidemiology in Psychiatry, Central Institute of Mental Health, Medical Faculty Mannheim, Heidelberg University, Mannheim, Germany
- <sup>80</sup>Department of Biomedicine, University of Basel, Basel, Switzerland
- <sup>81</sup>Institute of Medical Genetics and Pathology, University Hospital Basel, Basel, Switzerland
- <sup>82</sup>Institute of Neuroscience and Medicine (INM-1), Research Centre Jülich, Jülich, Germany
- <sup>83</sup>Biometric Psychiatric Genetics Research Unit, Alexandru Obregia Clinical Psychiatric Hospital, Bucharest, Romania
- <sup>84</sup>Department of Psychiatry, Laboratory of Psychiatric Genetics, Poznan University of Medical Sciences, Poznan, Poland
- <sup>85</sup>Cancer Epidemiology and Prevention, M. Sklodowska-Curie National Research Institute of Oncology, Warsaw, Poland
- <sup>86</sup>Department of Translational Research in Psychiatry, Max Planck Institute of Psychiatry, Munich, Germany
- <sup>87</sup>Munich Cluster for Systems Neurology (SyNergy), Munich, Germany
- <sup>88</sup>University of Liverpool, Liverpool, United Kingdom
- <sup>89</sup>Department of Environmental Epidemiology, Nofer Institute of Occupational Medicine, Lodz, Poland
- <sup>90</sup>Department of Psychiatry and Behavioral Sciences, Johns Hopkins University School of Medicine, Baltimore, Maryland, USA
- <sup>91</sup>Department of Psychiatry and Psychotherapy, University Medical Center Göttingen, Göttingen, Germany
- <sup>92</sup>Department of Psychiatry and Behavioral Sciences, SUNY Upstate Medical University, Syracuse, New York, USA
- <sup>93</sup>Department of Psychiatry, University of California San Diego, La Jolla, California, USA
- <sup>94</sup>Faculté de Médecine, Université Paris Est, Créteil, France
- <sup>95</sup>Department of Psychiatry and Addiction Medicine, Assistance Publique - Hôpitaux de Paris, Paris, France
- <sup>96</sup>Institut national de la santé et de la recherche médicale (Inserm), Paris, France
- <sup>97</sup>Inserm U955, Psychiatrie Translationnelle, Créteil, France
- <sup>98</sup>UMR-S1144 Team 1 Biomarkers of relapse and therapeutic response in addiction and mood

disorders, Inserm, Paris, France

<sup>99</sup>Psychiatry, Université Paris Diderot, Paris, France

<sup>100</sup>Centre for Affective Disorders, Institute of Psychiatry, Psychology and Neuroscience, London, UK

<sup>101</sup>Paris Bipolar and TRD Expert Centres, FondaMental Foundation, Paris, France

<sup>102</sup>Centre for Addiction and Mental Health, Toronto, Ontario, Canada

<sup>103</sup>Department of Psychiatry, Dalhousie University, Halifax, Nova Scotia, Canada

<sup>104</sup>National Institute of Mental Health, Klecany, Czech Republic

<sup>105</sup>Department of Psychiatry, Mood Disorders Program, McGill University Health Center, Montréal, Québec, Canada

<sup>106</sup>Department of Health Sciences Research, Mayo Clinic, Rochester, Minnesota, USA

<sup>107</sup>Department of Psychiatry & Psychology, Mayo Clinic, Rochester, Minnesota, USA

<sup>108</sup>Research Institute, Lindner Center of HOPE, Mason, Ohio, USA

<sup>109</sup>Center for Statistical Genetics and Department of Biostatistics, University of Michigan, Ann Arbor, Michigan, USA

<sup>110</sup>Department of Genetics and Genomic Sciences, Icahn School of Medicine at Mount Sinai, New York, New York, USA

<sup>111</sup>Medical and Population Genetics, Broad Institute of MIT and Harvard, Cambridge, Massachusetts, USA

<sup>112</sup>Institute of Neuroscience and Physiology, the Sahlgrenska Academy at Gothenburg University, Gothenburg, Sweden

<sup>113</sup>Department of Medical Genetics, Oslo University Hospital, Oslo, Norway

<sup>114</sup>NORMENT Centre, Department of Clinical Science, University of Bergen, Bergen, Norway

<sup>115</sup>Department of Mental Health, Norwegian University of Science and Technology - NTNU, Trondheim, Norway

<sup>116</sup>Department of Psychiatry, St Olavs' University Hospital, Trondheim, Norway

<sup>117</sup>Department of Psychiatry, University of Münster, Münster, Germany

<sup>118</sup>Department of Psychiatry, Melbourne Medical School, University of Melbourne, Melbourne, Victoria, Australia

<sup>119</sup>Florey Institute for Neuroscience and Mental Health, University of Melbourne, Parkville, Victoria, Australia

<sup>120</sup>Discipline of Psychiatry, The University of Adelaide, Adelaide, South Australia, Australia

<sup>121</sup>Department of Psychiatry, Lausanne University Hospital and University of Lausanne, Lausanne, Switzerland

<sup>122</sup>Psychiatry & Behavioral Sciences, Stanford University, Stanford, California, USA

<sup>123</sup>Department of Psychiatry, Columbia University College of Physicians and Surgeons, New York, New York, USA

<sup>124</sup>Division of Translational Epidemiology, New York State Psychiatric Institute, New York, New York, USA

<sup>125</sup>Department of Psychiatry, University of Iowa, Iowa City, Iowa, USA

<sup>126</sup>Division of Cancer Epidemiology and Genetics, National Cancer Institute, Bethesda, Maryland, USA

<sup>127</sup>Psychiatry & The Behavioral Sciences, University of Southern California, Los Angeles, California, USA

<sup>128</sup>Max Planck Institute of Psychiatry, Munich, Germany

<sup>129</sup>Department of Biological Psychology/Netherlands Twin Register, Vrije Universiteit Amsterdam, Amsterdam, The Netherlands

<sup>130</sup>Amsterdam Public Health research institute, Amsterdam UMC, Amsterdam, The Netherlands

<sup>131</sup>Department of Psychiatry, Vrije Universiteit Medical Center and GGZ inGeest, Amsterdam,



The Netherlands

<sup>132</sup>Child and Adolescent Psychiatry, Erasmus Medical Center, Rotterdam, The Netherlands

<sup>133</sup>Department of Psychiatry and Psychotherapy, University Medicine Greifswald, Greifswald, Germany

<sup>134</sup>Institute of Community Medicine, University Medicine Greifswald, Greifswald, Germany

<sup>135</sup>Interfaculty Institute for Genetics and Functional Genomics, University Medicine Greifswald, Greifswald, Germany

<sup>136</sup>Kaiser Permanente Northern California, San Francisco, California, USA

<sup>137</sup>School of Psychology and Counseling, Queensland University of Technology, Brisbane, Queensland, Australia

<sup>138</sup>Department of Psychiatry, Icahn School of Medicine at Mount Sinai, One Gustave L. Levy Place, New York, New York, USA

<sup>139</sup>Social, Genetic and Developmental Psychiatry Centre, King's College London, London, United Kingdom

<sup>140</sup>Division of Psychiatry, University of Edinburgh, Edinburgh, United Kingdom

<sup>141</sup>NIHR Maudsley Biomedical Research Centre, King's College London, London, United Kingdom

<sup>142</sup>Centre for Cognitive Ageing and Cognitive Epidemiology, University of Edinburgh, Edinburgh, United Kingdom

<sup>143</sup>Department of Medical & Molecular Genetics, King's College London, London, United Kingdom

<sup>144</sup>Center for Neonatal Screening, Department for Congenital Disorders, Statens Serum Institut, Copenhagen, Denmark

<sup>145</sup>Copenhagen Mental Health Center, Mental Health Services Capital Region of Denmark Copenhagen, Copenhagen, Denmark

<sup>146</sup>Department of Clinical Medicine, Faculty of Health and Medical Sciences, University of Copenhagen, Copenhagen, Denmark

<sup>147</sup>Psychosis Research Unit, Aarhus University Hospital, Risskov, Denmark

<sup>148</sup>Centre for Integrative Sequencing (iSEQ), Aarhus University, Aarhus, Denmark

<sup>149</sup>National Centre for Register-Based Research (NCCR), Aarhus University, Aarhus, Denmark

<sup>150</sup>Centre for Integrated Register-based Research (CIRRAU), Aarhus University, Aarhus, Denmark

<sup>151</sup>Institute of Biological Psychiatry, Mental Health Center Sct. Hans, Mental Health Services Copenhagen, Roskilde, Denmark

<sup>152</sup>Concert Pharmaceuticals, Inc., Lexington, Massachusetts, USA

<sup>153</sup>Department of Psychiatry and Vincent Department of Obstetrics, Gynecology & Reproductive Biology, Massachusetts General Hospital, Boston, Massachusetts, USA

<sup>154</sup>MGH-MIT-HMS Athinoula A. Martinos Center for Biomedical Imaging, Charlestown, Massachusetts, USA

<sup>155</sup>Departments of Psychiatry and Medicine, Harvard Medical School, Boston, Massachusetts, USA

### Corresponding authors:

Jill M. Goldstein, Ph.D., Massachusetts General Hospital; Innovation Center on Sex Differences in Medicine; 185 Cambridge St. Suite 2000 Rm. 2.298; Boston, MA 02114 ; Tel: +1-617-724-3776; E-mail: [jill\\_goldstein@hms.harvard.edu](mailto:jill_goldstein@hms.harvard.edu)

Gabriëlla A. M. Blokland, Ph.D., School for Mental Health and Neuroscience, Faculty of Health, Medicine and Life Sciences, Maastricht University, Universiteitssingel 40, room C2.572; 6229 ER Maastricht, The Netherlands; Tel: +31 (0)43-3884110; E-mail: [gam.blokland@maastrichtuniversity.nl](mailto:gam.blokland@maastrichtuniversity.nl)

**RUNNING TITLE:** sex-dependent genetic architecture

Text body word count: 5494

Abstract word count: 264

Number Tables/Figures: 2+2

Number References: 101

Supplementary Materials: Suppl. Methods; 21 Suppl. Tables, 22 Suppl. Figures

# Abstract

**BACKGROUND:** Sex differences in the incidence and/or presentation of schizophrenia (SCZ), major depressive disorder (MDD), and bipolar disorder (BIP) are pervasive. Previous evidence for shared genetic risk and sex differences in brain abnormalities across these disorders suggest possible shared sex-dependent genetic risk.

**METHODS:** We conducted the largest to date genome-wide genotype-by-sex (GxS) interaction analysis of risk for these disorders, using data from 85,735 cases (33,403 SCZ, 19,924 BIP, 32,408 MDD) and 109,946 controls from the Psychiatric Genomics Consortium (PGC) and iPSYCH.

**RESULTS:** Across disorders, genome-wide significant SNP-by-sex interaction was detected for a locus encompassing *NKAIN2* gene (rs117780815;  $p=3.2\times10^{-8}$ ), that interacts with sodium/potassium-transporting ATPase enzymes important for neuronal excitability. Three additional loci showed evidence ( $p<1\times10^{-6}$ ) for cross-disorder GxS interaction (rs7302529,  $p=1.6\times10^{-7}$ ; rs73033497,  $p=8.8\times10^{-7}$ ; rs7914279,  $p=6.4\times10^{-7}$ ) with various potential functions. Gene-based analyses identified GxS interaction across disorders ( $p=8.97\times10^{-7}$ ) with transcriptional inhibitor *SLTM*. Most significant in SCZ was a locus in the *MOCOS* gene (rs11665282;  $p=1.5\times10^{-7}$ ), implicating vascular endothelial cells. Secondary analysis of the SCZ PGC dataset detected a noteworthy interaction (rs13265509;  $p=1.1\times10^{-7}$ ) in a locus containing *IDO2*, a kynurenine pathway enzyme with an immunoregulatory function previously implicated in SCZ, BIP, and MDD. Pathway enrichment analysis detected significant GxS of genes regulating vascular endothelial growth factor (VEGF) receptor signaling in MDD ( $p_{FDR}<0.05$ ).

**CONCLUSIONS:** In the largest genome-wide GxS analysis of mood and psychotic disorders to date, there was substantial genetic overlap between the sexes. However, significant sex-dependent effects were enriched for genes related to neuronal development, immune and



vascular functions across and within SCZ, BIP, and MDD at the variant, gene, and pathway enrichment levels.

**Key words**

sex differences; schizophrenia; bipolar disorder; major depressive disorder; genome-wide association study; genotype-by-sex interaction

# Introduction

Sex differences are pervasive in psychiatric disorders, including major depressive disorder (MDD), schizophrenia (SCZ), and bipolar disorder (BIP). There is a significantly higher risk for MDD in females (1) and SCZ in males (2). BIP prevalence is approximately the same in both sexes, but age at onset, illness course, and prognosis vary considerably between the sexes (3, 4), as they do for SCZ and MDD (5-7). Additionally, certain brain regions share structural and functional abnormalities and dysregulated physiology across disorders that are sex-dependent (8, 9).

The majority of twin studies have not detected sex differences in heritability of these disorders (10) (and twin heritability includes sex chromosome effects), or differences in twin intra-pair correlations between same-sex and opposite-sex dizygotic twin pairs (11, 12). However, specific variants involved in disease etiology may not be the same in both sexes (i.e., “sex-specific” effects) or variants may have different effect sizes in each sex (i.e., “sex-dependent” effects). Sex-dependent modification of allelic effects on the autosomes and X chromosome may contribute to sex differences in disease prevalence, similar to what has been shown for several complex human traits (e.g., blood pressure, waist-hip ratio) (13, 14). Aside from sex-specific variants, incidence differences may result from a female protective effect, particularly for male-predominant neurodevelopmental disorders, whereby females may require a higher burden of genetic liability to cross the threshold to disease manifestation. This suggests quantitative differences (i.e., “sex-dependence”) in genetic risk, a notion that is supported by an early observation that female SCZ cases were more likely to come from multiplex families (15), i.e. families with multiple affected individuals.

With regard to SCZ, there is a long history of examining sex differences in familial (and specifically, genetic) transmission (16), although few systematic and rigorous studies exist using advanced technologies of genomic assessment. This is true even in light of population and

clinical studies identifying significant sex differences in incidence, expression, neuroanatomical and functional brain abnormalities, and course of SCZ (17, 18). As a whole, family and twin studies, and recent genome-wide association studies (GWAS), support the presence of both sex-specific and sex-dependent genetic influences (16). In fact, recent work in large genetic cohorts of SCZ and autoimmune disorders identified sex differences in complement component 4 (C4) genes, with greater effects of C4 alleles in men with SCZ than women (19, 20).

Whereas the incidence of SCZ is significantly, although modestly, higher in males, there is a larger sex difference in the incidence of MDD, with a 2:1 female predominance. Although large-scale GWAS have provided little support for sex differences in genetic predisposition to broadly defined MDD (21-24), there is promise in studying recurrent MDD (rMDD) in the context of sex differences, based on greater disparity in prevalence by sex than single-episode MDD reported in some studies (25, 26), although not others (7, 27). Recently, there has been increased interest in examining sex differences in genetic contributions to psychiatric disorders and related phenotypes (21, 28-35). Transcriptomics studies are also beginning to provide insights into the mechanisms underlying sex differences that may influence disease risk. Notably, over 10% of autosomal genes exhibit sexually dimorphic gene expression in the brain, predominantly genes related to synaptic transmission, dopamine receptor signaling, and immune response (36), suggesting potential mechanisms mediating sex differences in psychiatric disorders. GxS studies like ours can serve to highlight genes worthy of deeper investigation regarding the underlying mechanisms of sexual brain differentiation in risk and presentation of psychiatric disorders, e.g. through transcriptomics and proteomics research.

In order to test for sex differences in genetic risk, it is essential to have adequate power to test for an interaction effect (37). Given sample size limitations, GWAS of psychiatric disorders have typically not examined GxS interactions at a genome-wide level. Here, we capitalized on a unique opportunity to utilize cohorts from the PGC and iPSYCH consortia (22, 38, 39) (total N =

195,681) to assess interactions between sex and genetic risk of MDD, SCZ and BIP individually and shared across disorders.

# Methods and Materials

## *Subjects*

The Psychiatric Genomics Consortium (PGC) dataset (22, 38, 39) included 43 SCZ cohorts (30,608 patients, 38,441 controls), 28 BIP cohorts (18,958 patients, 29,996 controls), and 26 MDD cohorts (15,970 patients, 24,984 controls; **Supplementary Table 1**). The iPSYCH cohort in Denmark (40) included 2,795 SCZ patients and 2,436 controls, 966 BIP patients and 551 controls, and 16,438 MDD patients and 13,538 controls (**Supplementary Table 2**). Primary analyses used both the PGC and iPSYCH datasets. Secondary analyses of the PGC dataset alone (reported in **Supplementary Materials**) were performed to facilitate comparison to other PGC studies, and because the PGC and iPSYCH datasets use different diagnostic criteria (DSM-IV and ICD-10, respectively). All cohorts were of European ancestry, with the exception of 3 East Asian SCZ cohorts.

## *Data Quality Controls and Analytic Approaches*

Quality control (QC) and imputation to the 1000 Genomes Phase 1 reference panel were performed using the PGC's Rapid Imputation Consortium Pipeline (RicoPili) and previously described filtering thresholds (22, 38, 39). IBD filtering is described in the **Supplementary Methods**.

Sex-stratified GWAS summary statistics were obtained by logistic regression of males and females separately within each cohort using PLINK (41), followed by standard-error weighted meta-analysis across cohorts using METAL (42) (We provided the within-disorder meta-analysis summary statistics to a study by Martin et al, in submission). Summary statistics were entered into Linkage Disequilibrium (LD) Score Regression (LDSC) (43, 44) to estimate the autosomal sex-specific narrow sense SNP-based heritability ( $h^2_{SNP}$ ) for each disorder (**Figure**

1) and autosomal sex-specific and cross-sex bivariate genetic correlations ( $r_g$ ) within and across disorders.

PLINK (41) was used to perform a genome-wide GxS interaction analysis of each study cohort, followed by standard-error weighted meta-analysis of the GxS interaction results using METAL (42). GxS interaction analyses were performed using linear regression with a main effect for each SNP and SNP-by-sex interaction terms, using an additive model for each SNP (and controlling for 10 ancestry principal components).

GxS interactions with X-linked SNPs were tested using two different models. Model A assumed complete and uniform X-inactivation in females and similar effect size between males and females by assigning 0, 1, or 2 copies of an allele to females and 0 or 2 copies to males. As these assumptions often do not hold, Model B assigned 0 or 1 copy to males.

A three-degrees-of-freedom test omnibus test (45) was performed by summing the  $\chi^2$  values for each individual disease GxS interaction meta-analysis in order to identify SNPs with opposing effects across disorders (i.e., an allele is associated with increased risk of one disorder and decreased risk of another), which might eliminate each other in standard linear regression analyses. LD-independent SNPs ( $r^2 < 0.1$ ) with suggestive or genome-wide significant GxS interactions ( $p < 1 \times 10^{-6}$ ) were used as index SNPs for fine-mapping to obtain credible SNPs, i.e. most likely to be causal, using FINEMAP (46) (v1.3) and CAVIAR (47) (-r 0.95, posterior probability; -c 2, maximum number of causal SNPs). The region for fine-mapping was defined as all SNPs in LD ( $r^2 > 0.6$ ) with the index SNP.

SCZ and cross-disorder analyses of the autosomes and X chromosome were carried out with and without inclusion of the East Asian cohorts to evaluate population effects on GxS interaction. Subsequent analyses were limited to European ancestry given the gene- and



pathway-based analyses reported below require the application of an ancestry-specific reference panel.

Gene-based analyses were conducted using MAGMA (48) with an adjusted genome-wide significant  $p$ -value threshold of  $p < 2.6 \times 10^{-6}$ , accounting for 19,427 autosome and sex chromosome genes tested (see Supplementary Methods for details). Gene set enrichment tests were performed using MAGMA (48) to explore functional similarity of genes implicated by GxS interaction analyses. Hypothesis-free analyses were performed for 10,353 gene sets from the Molecular Signatures Database (MSigDB; **Supplementary Methods**). Data-driven enrichment analyses were performed for 9 gene sets/ pathways implicated in prior studies: three immune/neurotrophic, synaptic, and histone methylation gene sets reported to be enriched across the PGC SCZ, BIP, and MDD cohorts (49), and six central nervous system (CNS) pathways enriched in the CLOZUK+PGC SCZ cohort (50). The pathway enrichment  $p$ -values were FDR-corrected based on the number of pathways tested.

Gene expression and expression quantitative trait locus (eQTL) data from several publicly available resources were evaluated to validate and interpret SNPs with a GxS interaction  $p$ -value  $< 1 \times 10^{-6}$  (see **Supplementary Methods** for details).

GxS interaction results were compared to previously reported sex-dependent or sex-specific effects on psychiatric illness risk ( $p < 5 \times 10^{-8}$ ) from sex-stratified analyses by the PGC (29, 31, 35), ASD collection (30), 23andMe (21), and UK Biobank (32) (see Supplementary Methods). Additionally, GxS interaction effects were evaluated for SNPs with genome-wide significant main additive effects across sexes in the recent PGC cross-disorder group (CDG) study of eight disorders (includes the PGC SCZ, BIP, and MDD datasets analyzed in this study) (51).

# Results

## *Sex-stratified LD Score Regression*

Within each disorder, the  $h_{SNP}^2$  for males and females (**Figure 1a**) was significantly greater than 0 (mean 0.20; all  $p < 0.001$ ) (**Supplementary Table 3**), indicating that this study had adequate power to detect a broader polygenic signal. Estimates of  $h_{SNP}^2$  increased minimally across a range of MAF cutoffs (MAF>1%, 2%, 5%), indicating rarer variants contributed little to the heritability estimates (**Supplementary Table 3**). Heritability estimates were substantially different between the sexes for SCZ ( $p_{FDR} = 0.019$ ;  $h_M^2 > h_F^2$ ) and MDD ( $p_{FDR} = 0.005$ ;  $h_F^2 > h_M^2$ ), but not BIP ( $p_{FDR} = 0.381$ ) (**Supplementary Table 3**). SNP-based genetic correlations ( $r_g$ ) between males and females within each disorder ranged between 0.86 and 1 and were significantly different from 1 for SCZ ( $p_{FDR} = 0.039$ ) and BIP ( $p_{FDR} = 0.039$ ), but not MDD ( $p_{FDR} = 0.397$ ) (**Figure 1b**; **Supplementary Table 4a**). Additionally, we observed no significant differences in the cross-disorder genetic correlations between males and females, with the exception of  $r_g$  between BIP and MDD ( $r_{gF} = 0.42$ ;  $r_{gM} = 0.04$ ;  $p_{FDR} = 0.044$ ) (**Figure 1b**; **Supplementary Table 4b**).

## *Genome-wide SNP-by-Sex interaction for disease risk*

Quantile-quantile plots indicated no systematic inflation of test statistics (**Supplementary Figure 4**). Genomic control lambda ( $\lambda_{GC}$ ) revealed no significant evidence of population stratification in the meta-analysis of the cross-disorder European ancestry ( $\lambda_{GC}=0.9828$ ), cross-disorder European + East Asian ( $\lambda_{GC}=0.9838$ ), SCZ European ancestry ( $\lambda_{GC}=0.9991$ ), SCZ European + East Asian ( $\lambda_{GC}=1.002$ ), BIP ( $\lambda_{GC}=0.9879$ ), or MDD ( $\lambda_{GC}=0.9833$ ) cohorts.

Omnibus tests of autosomal SNP GxS effects across disorders revealed a genome-wide significant locus in the *NKAIN2* gene (rs117780815;  $p=3.2\times 10^{-8}$ ; **Figure 2**) driven by BIP and SCZ. The effect was in opposite directions, with the minor allele increasing risk in BIP females and decreasing risk in BIP males, and vice versa in SCZ females and males (**Table 1**, **Supplementary Table 5**). The second strongest omnibus signal was for the *AMIGO1/GPR61* gene locus (rs12141273;  $p=4.16\times 10^{-7}$ ), common to BIP and MDD, though in opposite directions. Of note, omnibus tests of the PGC dataset detected the second strongest signal (after *NKAIN2*) in the *IDO2/C8orf4* gene locus (rs13270586;  $p=1.55\times 10^{-7}$ ), common to BIP and SCZ in opposite directions (**Supplementary Table 6**). As shown in **Supplementary Table 7-8**, omnibus tests of X chromosome SNPs detected no significant interactions (lowest  $p = 1.67\times 10^{-5}$ ).

Analyses within disorders did not detect genome-wide significant interactions for SCZ, BIP, or MDD, however suggestive evidence ( $p<1\times 10^{-6}$ ) was obtained for several loci (**Table 2**, **Supplementary Tables 9-10**). Overall, there was little overlap between the strongest interactions for each disorder (**Supplementary Figure 2**). The most significant results were obtained for SCZ for a locus in the 5' UTR of the *MOCOS* gene (rs11665282;  $p=1.48\times 10^{-7}$ ) and an intergenic locus near the non-coding RNA gene *LINC02181* (rs12445424;  $p=3.52\times 10^{-7}$ ). The top GxS interaction locus for BIP was located on chromosome 9 near the *TUSC1* gene (rs12341335;  $p=2.29\times 10^{-7}$ ). Suggestive evidence for GxS effects in MDD risk was detected for a chromosome 1 locus in and around *SPAG17* (rs9428240;  $p=1.64\times 10^{-7}$ ), which remained in rMDD ( $p=1.40\times 10^{-7}$ ), and a chromosome 17 locus spanning multiple genes including *ZNF385C* (rs147515485;  $p=4.61\times 10^{-7}$ ). Post-hoc analysis of rMDD did not reveal additional loci at  $p < 1\times 10^{-6}$ . Secondary analyses of the PGC SCZ dataset (without iPSYCH) identified a noteworthy locus in an intergenic region between the *IDO2* and *C8orf4* genes (rs13265509;  $p=1.09\times 10^{-7}$ ; **Supplementary Table 10e**).

Meta-analysis of GxS interaction results across cohorts from all 3 disorders (in contrast to omnibus tests) did not reveal additional genome-wide significant interactions across the three disorders. However, three independent loci, all intergenic, exhibited at least suggestive evidence ( $p < 1 \times 10^{-6}$ ) for different effects on cross-disorder risk in males and females (**Table 2, Supplementary Table 9a-d**).

SNP-by-sex interaction analyses of X chromosome SNPs under model A or model B detected only modest interactions within and across disorders (lowest  $p = 6.89 \times 10^{-6}$ ; **Supplementary Table 11a,b**). Results from the two models did not differ substantially, as indicated by scatter plots showing substantial correlation between  $p$ -values (**Supplementary Figure 12**).

Inclusion of East Asian ancestry SCZ cohorts, which represent a relatively small component of the SCZ dataset (7.56% of PGC; 7.03% of PGC+iPSYCH), did not substantially improve SNP-by-sex interaction results. For this reason (and given that the gene- and pathway-based analyses reported below required the application of an ancestry-specific reference panel), all subsequent analyses utilized only European ancestry cohorts.

#### *Identification of credible SNPs for SNP-by-sex interaction GWAS loci.*

The loci displaying suggestive evidence for GxS interactions ( $p < 1 \times 10^{-6}$ ) in the SNP-by-sex analyses (**Tables 1-2, Supplementary Tables 5, 6, 9, 10**) underwent fine-mapping using index SNPs to identify credible SNPs (i.e., those most likely to be causal). These 16 loci had a mean of 75 ( $\pm 68$ ) SNPs. In approximately half of the loci, the index SNP was among the three most credible SNPs, and >70% of clumps had a “simple” model ( $\leq 3$  causal variants). We summarize the posterior probabilities of all SNPs in the fine-mapping loci (**Supplementary Tables 13-14**) and highlight SNPs that are most likely to have a causal effect on mood and psychotic disorders. In many loci, CAVIAR and FINEMAP were in partial agreement. There

were multiple SNPs, including rs117780815 (*NKAIN2*), with posterior probability higher than 0.90. These SNPs are the most likely variants to have a causal effect on mood and psychotic disorders.

### *Gene- and pathway-based analyses*

Gene-based tests across and within each disorder detected genome-wide significant GxS interaction of the *SLTM* gene across disorders ( $p=8.97\times 10^{-7}$ ; Bonferroni-corrected threshold:  $p<2.6\times 10^{-6}$ ) and near significant interaction within SCZ ( $p=4.22\times 10^{-6}$ ). No other results approached significance (**Supplementary Tables 15-16**).

Gene set enrichment tests were performed to determine whether SNPs exhibiting some degree of GxS interaction ( $p<1\times 10^{-4}$ ) clustered into particular biological pathways. Across disorders (regular meta-analysis), the 'wang\_barretts\_esophagus\_and\_esophagus\_cancer\_dn' pathway showed enrichment ( $p_{\text{FDR}} = 0.035$ ) (**Supplementary Table 17d**). Within MDD, the SNPs were significantly enriched in genes involved in regulation of vascular endothelial growth factor (VEGF) receptor signaling ( $p_{\text{FDR}} = 0.3.9\times 10^{-4}$ ) (**Supplementary Table 17g**). SNPs from GxS interaction analyses within SCZ or BIP were not significantly enriched for any particular MSigDB pathway (all  $p_{\text{FDR}} > 0.05$ ) (**Supplementary Table 17-18**).

### *Brain expression analysis*

Brain expression data were examined for genes located adjacent to SNPs with suggestive evidence for GxS interactions ( $p<1\times 10^{-6}$ ; **Tables 1-2**). Most of the genes examined were expressed in multiple brain regions at several stages from prenatal neurodevelopment through adulthood (**Supplementary Figures 20-23**). However, some of the genes are predominantly expressed prenatally in one or more regions (*CRSP2*, *MOCOS*, *C8orf4*, *SPAG17*) or, in the case of *IDO2*, at the beginning of puberty (8-12 years) in prefrontal and orbitofrontal cortex

(**Supplementary Figure 22**). Evaluation of sex-specific expression detected different expression levels between males and females of several of the genes in some brain regions (**Supplementary Figure 21**). Among seven brain cell types, the genes examined are expressed in various cell types, with no preponderance of expression in a particular type (**Supplementary Figure 24**).

### *eQTL overlap with GxS loci*

Examination of eQTL data for SNPs with suggestive evidence for GxS interactions ( $p < 1 \times 10^{-6}$ ; **Tables 1-2**) found that the top omnibus cross-disorder SNP (rs117780815) in *NKAIN2* was not an eQTL according to any database, while the second most significant SNP genome-wide (rs12141273), intergenic between *AMIGO1* and *GPR61*, is a cis-eQTL for *AMIGO1* in non-brain tissues and is associated with expression of the glutathione-S-transferase genes *GSTM1* and *GSTM5*, and the microtubule regulator gene *PSRC1*, in DLPFC (**Table 1**). The most significant cross-disorder SNP (rs7302529) (regular meta-analysis) was an eQTL for the nearest gene, *CSRP2*, in several brain regions (**Table 2**). The most significant SCZ SNP (rs11665282) in *MOCOS* was a cis-eQTL in several brain regions (**Table 2**) and is associated with cerebellar and DLPFC expression of the *ELP2* gene, which functions in transcriptional elongation and potentially chromatin remodeling.

### *Evaluation of GxS interaction for sex-dependent and cross-disorder SNPs from prior studies*

Of four SNPs with nominally significant SNP-by-sex interactions ( $p < 0.05$ ) identified in a 23andMe study of MDD (21), two SNPs exhibited nominally significant GxS interactions in our analyses (**Supplementary Table 21**) of MDD (rs2042772;  $p=0.037$ ) and BIP (rs4543289;  $p=0.034$ ). SNPs with significant sex-dependent effects ( $p < 5 \times 10^{-8}$ ) in prior within-disorder studies of ADHD, OCD, PTSD, and ASD (29-31, 35, 52) or UK Biobank psychiatric phenotypes (32) had non-significant ( $p_{\text{FDR}} > 0.05$ ) GxS interaction  $p$ -values in this study. Among the genome-wide significant results in a PGC cross-disorder (non-sex-stratified) analysis of 8



psychiatric disorders (51), rs7521492 had a  $p$ -value of  $4.2 \times 10^{-4}$  in our GxS omnibus test of SCZ, BIP and rMDD ( $p_{\text{FDR}} = 0.034$ ); rs11688767 had a  $p$ -value of  $3.2 \times 10^{-4}$  in our meta-analysis of rMDD ( $p_{\text{FDR}} = 0.034$ ). Of note, *CSMD1*, identified in the PGC-CDG cross-disorder analysis (51), was among our top cross-disorder GxS results (regular meta-analysis). However, the most significant SNP in each analysis differed.

# Discussion

Sex differences in incidence, age of onset, presentation of symptoms, and/or brain abnormalities and physiology in SCZ, BIP, and MDD are pervasive (1-7). Previous work has demonstrated the impact of gonadal hormones on some of these phenotypic sex differences. Here, we hypothesized these sex differences may, in part, be due to differences in genetic variation, either sex-specific or sex-dependent, and that these risk variants may be shared across the disorders.

Heritability estimates were significantly different between the sexes for SCZ and MDD, but not BIP. In contrast, SNP-based genetic correlations between males and females ranged between 0.86 (BIP) and 1 (MDD) and were significantly different from 1 for SCZ and BIP, but not MDD, suggesting modest genetic architecture differences between males and females. Taken together, these results indicate that, although the vast majority of common variant genetic effects are shared by men and women, it is likely there are sex-specific and sex-dependent effects on disorder risks, although modest in effect sizes (31).

Significant sex effects, including sex-stratified associations, have been reported in GWAS studies of other psychiatric disorders (21, 22, 29-35). *Sex-stratified* statistics, calculated within-disorder as part of our study in the PGC-only samples, were extended in a recent set of analyses (Martin et al., in submission), which aimed to evaluate sex differences in heritability estimates and genetic correlations of multiple psychiatric disorders and relevant quantitative phenotypes. Mechanisms implicated across multiple sex-stratified studies of divergent methodologies and statistical approaches included CNS-related or neurodevelopmental mechanisms and immune pathways (21, 30, 31, 33), supporting findings here and suggesting some degree of consistency of sex-dependent genetic effects despite diverse samples and phenotypes.

With regard to neurodevelopmental mechanisms, omnibus tests across the disorders detected genome-wide significant evidence for GxS interaction emanating from the *NKAIN2* gene, which is specifically expressed in brain and interacts with potassium sodium ATPases that regulate neuron membrane potential, transmembrane fluxes of  $\text{Ca}^{2+}$  and excitatory neurotransmitters, and CNS differentiation (53). *NKAIN2* has previously been associated with general cognitive ability (54) and risk for schizophrenia (55, 56). The second most significant omnibus GxS result was a SNP adjacent to *AMIGO1*, which regulates activity of the Kv2.1 voltage-dependent potassium channel (57), again important for regulating neuronal excitability in brain (58). Other support for GxS interaction was obtained from gene-based analyses across disorders that detected a genome-wide significant GxS interaction with the *SLTM* gene, a general inhibitor of transcription that is highly expressed in cerebellum and putamen, among other regions. Taken together, these findings suggest a sex-dependent genetic contribution to the balance between excitatory and inhibitory regulation of neuronal development and functioning, a hypothesis worthy of further functional “omics” investigations.

In fact, the strongest locus identified in our secondary GxS interaction analyses for SCZ (using the PGC dataset) (rs13270586;  $p=1.55 \times 10^{-7}$ ) was near *C8orf4* (aka *TCIM*), which functions as a positive regulator of the Wnt/ $\beta$ -catenin signaling pathway that has a central role in fundamental neuronal processes—including synaptogenesis, axon guidance, and dendrite development (59)—and a pathway previously implicated in SCZ, BIP, and MDD (60-63). Interestingly, recent transcriptomic work identified female-biased genes enriched for expression in Cajal-Retzius cells, an early form of neuron that plays a major role in neural migration, whereas male-biased genes were enriched for neural progenitor cells (64), suggesting sex differences at the level of neuron development. This is consistent with our earlier work in mice with impaired GABA-B receptor signaling and demonstrating sex differences in developmental

migration of neurons containing estrogen receptor (ER)- $\alpha$  into the paraventricular nucleus of the hypothalamus (PVN) and impact on depressive-associated behaviors, particularly in females (65).

Several of the strongest omnibus results had opposite effects on risk of the disorders by sex. For example, the *NKAIN2* GxS interaction effect was opposite in SCZ and BIP, with the minor allele increasing risk in SCZ females and showing a trend towards decreased risk in SCZ males, and opposite effects on risk in BIP females and males. Similarly, the *AMIGO1/GPR61* GxS effect was opposite in BIP and MDD, with the minor allele having a stronger effect in females in BIP and weaker effect in females in MDD versus males. Opposite effects on disease risk were also recently reported in a GWAS across eight psychiatric disorders, though this concerned the main additive effect of the SNP (51), not GxS effects. While opposite GxS effects have not previously been reported across multiple psychiatric or somatic diseases, opposite gene effects in males and females have been reported within disorders, e.g. in association with asthma (66), and on transcription in MDD (67). Sex-by-diagnosis interactions were seen in the rearrangement of brain transcriptional patterns in MDD (67), an effect also seen in stressed mice (68). In MDD, cell type-specific analyses revealed men with MDD exhibited transcriptional increases in oligodendrocyte- and microglia-related genes, while women with MDD had transcriptional decreases in markers of these cell types (67).

Several mechanisms could account for opposite direction interactions by disorder, including balancing selection due to antagonistic pleiotropic effects on the disorders (69). Our analysis implies that variants with opposite effects on different diseases may facilitate the maintenance of common susceptibility alleles in human populations. Opposing effects suggest the potential presence of a ‘genetic switch’ for progression to either one of the diseases, in addition to shared genetic risk factors. Results in autism (70) and SCZ support the idea in (71)

that these disorders may be opposite extremes of a single gradient of mental disorders or could be due to diametric gene-dosage deviations caused by disrupted genomic imprinting (70) or copy number variants. Further, “sexual antagonism” occurs when genetically correlated traits have opposite effects on male and female fitness (72). This could play an important role in maintaining genetic variation in the population. These results underscore the complexity of GxS relationships among related disorders and suggest that overall sex-specific and sex-dependent genetic correlations may obscure a more complex set of genetic relationships at the level of specific loci, brain regions, and pathways (51).

A number of identified genes in our study are expressed in immune cells, not surprising given the substantial sex differences in development and functioning of immune cells and autoimmunity (73, 74). In fact, among the strongest results for MDD was a locus spanning *ZNF385C*, which is implicated in transcriptional regulation (75) and immune-related phenotypes via enhancers (i.e. transcription factors) (76, 77). Further, it may play a role in cognition, since its paralogs *ZNF385B* and *ZNF385D*, were associated with intelligence (78), general cognitive ability, mathematical ability and educational attainment (79). It is possible that genes associated with cognitive abnormalities may be shared across disorders, given that the two strongest GxS interaction loci for BIP located near *TUSC1* and *FHL2* have been associated with depression, educational attainment, and other cognitive phenotypes (79, 80).

Our findings on sex-biased genes implicating immune mechanisms at the population level complement recent transcriptomic work in healthy brain development (81) and MDD (discussed above) (67), and human population work in SCZ (19). Consistent with this, animal studies have demonstrated sex differences in microglia density and morphology in key brain regions beginning early in prenatal development (e.g. hypothalamic preoptic area (POA), hippocampus, amygdala), the latter of which was investigated in human postmortem work in (67). For example, in males *in utero*, microglia morphology in the POA is ameboid, representing

the activated state in which increased inflammatory cytokines and prostaglandins are produced. Heightened *in utero* activation of microglia in males may create a priming effect leading to sex-dependent vulnerability for neurodevelopmental disorders such as SCZ (82).

In fact, immune pathway dysregulation was shared across our disorders of interest here. In our secondary analyses of the PGC dataset alone the strongest GxS interaction for SCZ was in a locus between *IDO2* and *C8orf4* (rs13270586;  $p=1.55\times 10^{-7}$ ), with opposite effects on disease risk in males and females. *IDO2* is involved in catabolism of tryptophan in the kynurenine pathway. An end metabolite of the kynurenine pathway, kynurenic acid (KYNA), is elevated in the cerebrospinal fluid (83, 84) and postmortem brains (85, 86) of patients with SCZ or BIP with psychotic symptoms, while reduced plasma levels were associated with depressive symptoms (83). Given recent evidence implicating the kynurenine pathway as a link between brain immune activation and risk of psychiatric disorders (e.g. (87, 88)), and sex differences in immune mechanisms (89), it is plausible that *IDO2* has different effects on SCZ risk in males and females through differential KYNA expression between the sexes. This is consistent with the most recent findings implicating the complement system (C4) as a source of sexual dimorphisms in vulnerability to SCZ and autoimmune disorders (20).

Our findings also identified genes associated with vascular development, which is interesting in light of the link between the vasculature, risk and expression of cardiovascular disease (CVD), and comorbidity of CVD with disorders like MDD (i.e., comorbidity higher in women) (90). Genes involved in regulation of VEGF signaling were enriched among GxS loci for MDD in our analyses. Sex differences have been observed in serum VEGF levels throughout life (91), and brain expression of VEGF has been associated with cognitive aging and Alzheimer's disease (92, 93). Further, the strongest GxS interaction was detected for SCZ in the 5' UTR of *MOCOS* (rs11665282;  $p=1.48\times 10^{-7}$ ), which, based on evaluation of brain expression datasets, is highly expressed in endothelial cells lining blood vessels (**Supplementary Figure**



24). Interestingly, our previous work on sex differences in the positioning of cells containing ER $\alpha$  in the PVN associated with impaired GABA-B signaling (65) also was significantly associated with sex differences in vascular development, being more severe in females and associated with depression-related behaviors (94). These previous studies suggest potentially shared genetic risks across these disorders with vascular dysfunctions and may explain high comorbidity of disorders like MDD and SCZ with CVD (90). In fact, a recent meta-analysis of 22 available gene expression microarrays across multiple organs and tissues cited areas of the brain (i.e., anterior cingulate cortex, implicated in MDD, SCZ and BIP) with the most substantial sex differences in gene expression, followed by the heart (95).

Although it seems intuitive that genes located on sex chromosomes would be involved in sex differences in disease risk, our analyses did not detect evidence for GxS interactions involving X chromosome SNPs (lowest  $p$ -value =  $1.67 \times 10^{-5}$  for omnibus test and  $6.89 \times 10^{-6}$  for the regular meta-analyses). A lack of significant results could be due to insensitive quantitative modeling of the X chromosome by sex. Development of more refined models that allow for variability in X inactivation patterns across genes and individuals, and incorporate the Y chromosome, will be important for clarifying the role of sex chromosome genes in disease risk.

Nevertheless, our results of GxS interactions for autosomal genes are consistent with transcriptomics data demonstrating sexually dimorphic expression in the brain of a substantial proportion of autosomal genes related to fundamental neural functions (36, 64, 67, 96) and data enriched for tissue-related functions and diseases, such as neurodegenerative disease risk genes in brain tissue (97). Thus, sexual dimorphisms in the transcriptome may contribute to understanding sex differences in incidence and prevalence of diseases (98). With regard to sex differences in the epigenome, Van Dongen et al. (99) found genetic and environmental influences interacting with sex (and age) to shape the methylome, which may in part, implicate

the gonadal hormone regulation of gene expression and sex differences in disease risk. Further, our findings related to synaptic transmission and immune response are among the gene sets showing the strongest sexually dimorphic brain expression (36), again suggesting potential mechanisms mediating sex differences in psychiatric disorders. Taken together, our findings underscore the utility of studies like ours on sex differences in genetic architecture (i.e. testing for interaction effects), that highlight genes worthy of deeper mechanistic investigations using transcriptomics and proteomics research and animal models.

Here, we report the largest genome-wide analysis of GxS interactions for psychiatric disorders to date. The analyses determined whether effect sizes were statistically different between the sexes, after which sex-stratified analyses were performed to characterize the effect size itself and the direction of effect within sex. In contrast, many studies initially perform a sex-stratified analysis followed by Z difference test. However, this is only equivalent to a formal GxS interaction test when there are no interactions between covariates and the sexes, and the trait variances are equivalent in the two sexes. As this is typically not the case, sex-stratified analyses may fail to detect significant sex differences.

A limitation of this study is the relatively low sex-stratified SNP heritability, for MDD males in particular (mean  $h_{SNP}^2 = 0.2$ ). Nevertheless, all heritability estimates were greater than zero and had very good precision (i.e., small standard errors), indicating the ability of this study to detect common variant effects. Genetic correlations between the sexes were high and only differed significantly for SCZ and BIP. In the latest PGC SCZ GWAS (manuscript in preparation), the cross-sex  $r_g$  did not significantly differ from zero, which may, in part, be due to an increased SCZ sample size and different meta-analysis composition. While genetic correlations between the sexes within-disorder were high, most striking were the differences in genetic correlations by disorder by sex. For example, high genetic correlations were observed

between MDD (both sexes) and BIP-females (0.42, 0.48), but much weaker with MDD (both sexes) and BIP-males (0.13, 0.04). A recent study suggested that this may reflect study recruitment bias or misclassification (100). This is less likely for our study presented here, given that men and women were recruited in different numbers across all three disorders (given their prevalences), but we showed no genetic correlations by sex among SCZ compared with high genetic correlations among MDD and BIP. Misclassification of cases is always a possibility, although clinical diagnoses were based on extensive DSM-IV or ICD-10 interviews, limiting the likelihood of this explanation. Further, if there were bias, it would require similar bias across multiple international institutions in substantial numbers.

Indeed, the lack of detailed clinical data prevented examination of important questions related to symptom type, severity, age at onset, and cognitive deficits. These limitations emphasize the need for larger, deeply-phenotyped datasets to fully characterize sex differences in genetic and *clinical* characteristics of these disorders, as highlighted by e.g. Khramtsova et al (31). As mentioned, there is a lack of adequate models in the field for testing sex chromosome effects. Notably, X inactivation is assumed to be entirely random and complete in the models tested here, whereas recent data suggest tissue-specific patterns of X inactivation (101).

*Conclusions.* In the largest genome-wide GxS analysis of mood and psychotic disorders to date, we find substantial genetic overlap between males and females for each disorder (i.e. high  $r_g$ ). However, we also find several loci that showed significant GxS interactions across and within SCZ, BIP, and MDD – *NKAIN2* at the variant level, *SLTM* at the gene level, and *VEGF* at pathway level. Functional genomics suggests that all of the genes examined are expressed in at least one brain region during prenatal development through adulthood, with most genes expressed in multiple brain regions at several developmental stages implicating mood/anxiety and cognition, and sex-specific expression of several genes and eQTL status in some brain regions.

Our results suggest that the risk for SCZ, MDD and BIP is impacted by the interactions of genotype with sex, beyond the impact of gonadal steroid hormones. Though specific mechanisms remain unknown, our study underscores the importance of designing large-scale genetic studies to include an examination of sex differences in genetic risk. Further investigation of specific loci exhibiting SNP-by-sex interactions within and across disorders will be important for dissecting the impact of sex, genes, and pathophysiology to identify potential targets for sex-dependent or sex-specific therapeutic interventions.

# Acknowledgments

These analyses were supported by a private donor, Ms. Gwill York, awarded to Dr. Jill Goldstein (JMG). JMG, ST, and RH's time on these analyses was also supported, in part, by ORWH-NIMH U54 MH118919 (Goldstein and Handa, multi-PIs), and TP's time by NIMH R01 MH092380 (Petryshen, PI). Funding sources for individual cohorts are provided in reference numbers (22, 38, 39).

# Consortia:

**Schizophrenia Working Group of the Psychiatric Genomics Consortium:** Stephan Ripke, Benjamin M. Neale, Aiden Corvin, James T. R. Walters, Kai-How Farh, Peter A. Holmans, Phil Lee, Brendan Bulik-Sullivan, David A. Collier, Hailiang Huang, Tune H. Pers, Ingrid Agartz, Esben Agerbo, Margot Albus, Madeline Alexander, Farooq Amin, Silviu A. Bacanu, Martin Begemann, Richard A. Belliveau Jr, Judit Bene, Sarah E. Bergen, Elizabeth Bevilacqua, Tim B. Bigdeli, Donald W. Black, Richard Bruggeman, Nancy G. Buccola, Randy L. Buckner, William Byerley, Wiepke Cahn, Guiqing Cai, Dominique Campion, Rita M. Cantor, Vaughan J. Carr, Noa Carrera, Stanley V. Catts, Kimberly D. Chambert, Raymond C. K. Chan, Ronald Y. L. Chen, Eric Y. H. Chen, Wei Cheng, Eric F. C. Cheung, Siow Ann Chong, C. Robert Cloninger, David Cohen, Nadine Cohen, Paul Cormican, Nick Craddock, James J. Crowley, David Curtis, Michael Davidson, Kenneth L. Davis, Franziska Degenhardt, Jurgen Del Favero, Ditte Demontis, Dimitris Dikeos, Timothy Dinan, Srdjan Djurovic, Gary Donohoe, Elodie Drapeau, Jubao Duan, Frank Dudbridge, Naser Durmishi, Peter Eichhammer, Johan Eriksson, Valentina Escott-Price, Laurent Essioux, Ayman H. Fanous, Martilias S. Farrell, Josef Frank, Lude Franke, Robert Freedman, Nelson B. Freimer, Marion Friedl, Joseph I. Friedman, Menachem Fromer, Giulio Genovese, Lyudmila Georgieva, Ina Giegling, Paola Giusti-Rodríguez, Stephanie Godard, Jacqueline I. Goldstein, Vera Golimbet, Srihari Gopal, Jacob Gratten, Lieuwe de Haan, Christian

Hammer, Marian L. Hamshire, Mark Hansen, Thomas Hansen, Vahram Haroutunian, Annette M. Hartmann, Frans A. Henskens, Stefan Herms, Joel N. Hirschhorn, Per Hoffmann, Andrea Hofman, Mads V. Hollegaard, David M. Hougaard, Masashi Ikeda, Inge Joa, Antonio Julià, René S. Kahn, Luba Kalaydjieva, Sena Karachanak-Yankova, Juha Karjalainen, David Kavanagh, Matthew C. Keller, James L. Kennedy, Andrey Khrunin, Yunjung Kim, Janis Klovins, James A. Knowles, Bettina Konte, Vaidutis Kucinskas, Zita Ausrele Kucinskiene, Hana Kuzelova-Ptackova, Anna K. Kähler, Claudine Laurent, Jimmy Lee Chee Keong, S. Hong Lee, Sophie E. Legge, Bernard Lerer, Miaoxin Li, Tao Li, Kung-Yee Liang, Jeffrey Lieberman, Svetlana Limborska, Carmel M. Loughland, Jan Lubinski, Jouko Lönnqvist, Milan Macek Jr, Patrik K. E. Magnusson, Brion S. Maher, Wolfgang Maier, Jacques Mallet, Sara Marsal, Manuel Mattheisen, Morten Mattingdal, Robert W. McCarley†, Colm McDonald, Andrew M. McIntosh, Sandra Meier, Carin J. Meijer, Bela Melegh, Ingrid Melle, Raquella I. Mesholam-Gately, Andres Metspalu, Patricia T. Michie, Lili Milani, Vihra Milanova, Younes Mokrab, Derek W. Morris, Ole Mors, Kieran C. Murphy, Robin M. Murray, Inez Myin-Germeys, Bertram Müller-Myhsok, Mari Nelis, Igor Nenadic, Deborah A. Nertney, Gerald Nestadt, Kristin K. Nicodemus, Liene Nikitina-Zake, Laura Nisenbaum, Annelie Nordin, Eadbhard O’Callaghan, Colm O’Dushlaine, F. Anthony O’Neill, Sang-Yun Oh, Ann Olincy, Line Olsen, Jim Van Os, Psychosis Endophenotypes International Consortium, Christos Pantelis, George N. Papadimitriou, Sergi Papiol, Elena Parkhomenko, Michele T. Pato, Tiina Paunio, Milica Pejovic-Milovancevic, Diana O. Perkins, Olli Pietiläinen, Jonathan Pimm, Andrew J. Pocklington, John Powell, Alkes Price, Ann E. Pulver, Shaun M. Purcell, Digby Quested, Henrik B. Rasmussen, Abraham Reichenberg, Mark A. Reimers, Alexander L. Richards, Joshua L. Roffman, Panos Roussos, Douglas M. Ruderfer, Veikko Salomaa, Alan R. Sanders, Ulrich Schall, Christian R. Schubert, Thomas G. Schulze, Sibylle G. Schwab, Edward M. Scolnick, Rodney J. Scott, Larry J. Seidman†, Jianxin Shi, Engilbert Sigurdsson, Teimuraz Silagadze, Jeremy M. Silverman,



Kang Sim, Petr Slominsky, Jordan W. Smoller, Hon-Cheong So, Chris C. A. Spencer, Eli A. Stahl, Hreinn Stefansson, Stacy Steinberg, Elisabeth Stogmann, Richard E. Straub, Eric Strengman, Jana Strohmaier, T. Scott Stroup, Mythily Subramaniam, Jaana Suvisaari, Dragan M. Svrakic, Jin P. Szatkiewicz, Erik Söderman, Srinivas Thirumalai, Draga Toncheva, Sarah Tosato, Juha Veijola, John Waddington, Dermot Walsh, Dai Wang, Qiang Wang, Bradley T. Webb, Mark Weiser, Dieter B. Wildenauer, Nigel M. Williams, Stephanie Williams, Stephanie H. Witt, Aaron R. Wolen, Emily H. M. Wong, Brandon K. Wormley, Hualin Simon Xi, Clement C. Zai, Xuebin Zheng, Fritz Zimprich, Naomi R. Wray, Kari Stefansson, Peter M. Visscher, Wellcome Trust Case-Control Consortium, Rolf Adolfsson, Ole A. Andreassen, Douglas H. R. Blackwood, Elvira Bramon, Joseph D. Buxbaum, Anders D. Børglum, Sven Cichon, Ariel Darvasi†, Enrico Domenici, Hannelore Ehrenreich, Tõnu Esko, Pablo V. Gejman, Michael Gill, Hugh Gurling, Christina M. Hultman, Nakao Iwata, Assen V. Jablensky, Erik G. Jönsson, Kenneth S. Kendler, George Kirov, Jo Knight, Todd Lencz, Douglas F. Levinson, Qingqin S. Li, Jianjun Liu, Anil K. Malhotra, Steven A. McCarroll, Andrew McQuillin, Jennifer L. Moran, Preben B. Mortensen, Sathish Periyasamy, Murray J. Cairns, Paul A. Tooney, Jing Qin Wu, Brian Kelly, Bryan J. Mowry, Markus M. Nöthen, Roel A. Ophoff, Michael J. Owen, Aarno Palotie, Carlos N. Pato, Tracey L. Petryshen, Danielle Posthuma, Marcella Rietschel, Brien P. Riley, Dan Rujescu, Pak C. Sham, Pamela Sklar, David St Clair, Daniel R. Weinberger, Jens R. Wendland, Thomas Werge, Mark J. Daly, Patrick F. Sullivan, Michael C. O'Donovan.

*Wellcome Trust Case-Control Consortium:* Management Committee: Peter Donnelly, Ines Barroso, Jenefer M. Blackwell, Elvira Bramon, Matthew A. Brown, Juan P. Casas, Aiden Corvin, Panos Deloukas, Audrey Duncanson, Janusz Jankowski, Hugh S. Markus, Christopher G. Mathew, Colin N. A. Palmer, Robert Plomin, Anna Rautanen, Stephen J. Sawcer, Richard C. Trembath, Ananth C. Viswanathan, Nicholas W. Wood. Data and Analysis Group: Chris C. A. Spencer, Gavin Band, Céline Bellenguez, Peter Donnelly, Colin Freeman, Eleni Giannoulidou,



Clarke, William Coryell, David W. Craig, Cristiana Cruceanu, David Curtis, Piotr M. Czerski, Anders M. Dale, Simone de Jong, Franziska Degenhardt, Jurgen Del-Favero, J. Raymond DePaulo, Srdjan Djurovic, Amanda L. Dobbyn, Ashley Dumont, Torbjørn Elvsåshagen, Valentina Escott-Price, Chun Chieh Fan, Sascha B. Fischer, Matthew Flickinger, Tatiana M. Foroud, Liz Forty, Josef Frank, Christine Fraser, Nelson B. Freimer, Katrin Gade, Diane Gage, Julie Garnham, Claudia Giambartolomei, Marianne Giørtz Pedersen, Jaqueline Goldstein, Scott D. Gordon, Katherine Gordon-Smith, Elaine K. Green, Melissa J. Green, Tiffany A. Greenwood, Jakob Grove, Weihua Guan, José Guzman-Parra, Marian L. Hamshire, Martin Hautzinger, Urs Heilbronner, Stefan Herms, Maria Hipolito, Per Hoffmann, Dominic Holland, Laura Huckins, Stéphane Jamain, Jessica S. Johnson, Radhika Kandaswamy, Robert Karlsson, James L. Kennedy, Sarah Kittel-Schneider, James A. Knowles, Manolis Kogevinas, Anna C. Koller, Ralph Kupka, Catharina Lavebratt, Jacob Lawrence, William B. Lawson, Markus Leber, Phil H. Lee, Shawn E. Levy, Jun Z. Li, Chunyu Liu, Susanne Lucae, Anna Maaser, Donald J. MacIntyre, Pamela B. Mahon, Wolfgang Maier, Lina Martinsson, Steve McCarroll, Peter McGuffin, Melvin G. McInnis, James D. McKay, Helena Medeiros, Sarah E. Medland, Fan Meng, Lili Milani, Grant W. Montgomery, Derek W. Morris, Thomas W. Mühleisen, Niamh Mullins, Hoang Nguyen, Caroline M. Nievergelt, Annelie Nordin Adolfsson, Evaristus A. Nwulia, Claire O'Donovan, Loes M. Olde Loohuis, Anil P. S. Ori, Lilijana Oruc, Urban Ösby, Roy H. Perlis, Amy Perry, Andrea Pfennig, James B. Potash, Shaun M. Purcell, Eline J. Regeer, Andreas Reif, Céline S. Reinbold, John P. Rice, Fabio Rivas, Margarita Rivera, Panos Roussos, Douglas M. Ruderfer, Euijung Ryu, Cristina Sánchez-Mora, Alan F. Schatzberg, William A. Scheftner, Nicholas J. Schork, Cynthia Shannon Weickert, Tatyana Shekhtman, Paul D. Shilling, Engilbert Sigurdsson, Claire Slaney, Olav B. Smeland, Janet L. Sobell, Christine Sørholm Hansen, Anne T. Spijker, David St Clair, Michael Steffens, John S. Strauss, Fabian Streit, Jana Strohmaier, Szabolcs Szelinger, Robert C. Thompson, Thorgeir E. Thorgeirsson, Jens

Treutlein, Helmut Vedder, Weiqing Wang, Stanley J. Watson, Thomas W. Weickert, Stephanie H. Witt, Simon Xi, Wei Xu, Allan H. Young, Peter Zandi, Peng Zhang, Sebastian Zöllner, eQTLGen Consortium, BIOS Consortium, Rolf Adolfsson, Ingrid Agartz, Martin Alda, Lena Backlund, Bernhard T. Baune, Frank Bellivier, Wade H. Berrettini, Joanna M. Biernacka, Douglas H. R. Blackwood, Michael Boehnke, Anders D. Børghlum, Aiden Corvin, Nicholas Craddock, Mark J. Daly, Udo Dannlowski, Tõnu Esko, Bruno Etain, Mark Frye, Janice M. Fullerton, Elliot S. Gershon, Michael Gill, Fernando Goes, Maria Grigoriou-Serbanescu, Joanna Hauser, David M. Hougaard, Christina M. Hultman, Ian Jones, Lisa A. Jones, René S. Kahn, George Kirov, Mikael Landén, Marion Leboyer, Cathryn M. Lewis, Qingqin S. Li, Jolanta Lissowska, Nicholas G. Martin, Fermin Mayoral, Susan L. McElroy, Andrew M. McIntosh, Francis J. McMahon, Ingrid Melle, Andres Metspalu, Philip B. Mitchell, Gunnar Morken, Ole Mors, Preben Bo Mortensen, Bertram Müller-Myhsok, Richard M. Myers, Benjamin M. Neale, Vishwajit Nimgaonkar, Merete Nordentoft, Markus M. Nöthen, Michael C. O'Donovan, Ketil J. Oedegaard, Michael J. Owen, Sara A. Paciga, Carlos Pato, Michele T. Pato, Danielle Posthuma, Josep Antoni Ramos-Quiroga, Marta Ribasés, Marcella Rietschel, Guy A. Rouleau, Martin Schalling, Peter R. Schofield, Thomas G. Schulze, Alessandro Serretti, Jordan W. Smoller, Hreinn Stefansson, Kari Stefansson, Eystein Stordal, Patrick F. Sullivan, Gustavo Turecki, Arne E. Vaaler, Eduard Vieta, John B. Vincent, Thomas Werge, John I. Nurnberger, Naomi R. Wray, Arianna Di Florio, Howard J. Edenberg, Sven Cichon, Roel A. Ophoff, Laura J. Scott, Ole A. Andreassen, John Kelsoe, Pamela Sklar†.

**Major Depressive Disorder Working Group of the Psychiatric Genomics Consortium:**

Naomi R. Wray, Stephan Ripke, Manuel Mattheisen, Maciej Trzaskowski, Enda M. Byrne, Abdel Abdellaoui, Mark J. Adams, Esben Agerbo, Tracy M. Air, Till F. M. Andlauer, Silviu-Alin Bacanu, Marie Bækvad-Hansen, Aartjan T. F. Beekman, Tim B. Bigdeli, Elisabeth B. Binder, Julien Bryois, Henriette N. Buttenschøn, Jonas Bybjerg-Grauholm, Na Cai, Enrique



Boomsma, Sven Cichon, Udo Dannlowski, Eco JC de Geus, J. Raymond DePaulo, Enrico Domenici, Katharina Domschke, Tõnu Esko, Hans J. Grabe, Steven P. Hamilton, Caroline Hayward, Andrew C. Heath, Kenneth S. Kendler, Stefan Kloiber, Glyn Lewis, Qingqin S. Li, Susanne Lucae, Pamela AF Madden, Patrik K. Magnusson, Nicholas G. Martin, Andrew M. McIntosh, Andres Metspalu, Ole Mors, Preben Bo Mortensen, Bertram Müller-Myhsok, Merete Nordentoft, Markus M. Nöthen, Michael C. O'Donovan, Sara A. Paciga, Nancy L. Pedersen, Brenda WJH Penninx, Roy H. Perlis, David J. Porteous, James B. Potash, Martin Preisig, Marcella Rietschel, Catherine Schaefer, Thomas G. Schulze, Jordan W. Smoller, Kari Stefansson, Henning Tiemeier, Rudolf Uher, Henry Völzke, Myrna M. Weissman, Thomas Werge, Cathryn M. Lewis, Douglas F. Levinson, Gerome Breen, Anders D. Børglum, Patrick F. Sullivan.

† deceased

**Sex differences cross-disorder analysis group of the Psychiatric Genomics Consortium:**

Martin Alda, Gabriëlla A. M. Blokland, Anders D. Børglum, Marco Bortolato, Janita Bralten, Gerome Breen, Cynthia M. Bulik, Christie L. Burton, Enda M. Byrne, Caitlin E. Carey, Jonathan R. I. Coleman, Lea K. Davis, Ditte Demontis, Laramie E. Duncan, Howard J. Edenberg, Lauren Erdman, Stephen V. Faraone, Jill M. Goldstein, Slavina B. Goleva, Jakob Grove, Wei Guo, Christopher Hußel, Laura M. Huckins, Ekaterina A. Khramtsova, Phil H. Lee, Joanna Martin, Carol A. Mathews, Manuel Mattheisen, Benjamin M. Neale, Roseann E. Peterson, Tracey L. Petryshen, Elise Robinson, Jordan W. Smoller, Eli Stahl, Barbara E. Stranger, Michela Traglia, Raymond K. Walters, Lauren A. Weiss, Thomas Werge, Stacey J. Winham, Naomi R. Wray, Yin Yao.

**iPSYCH: Management Group:** Anders D. Børglum, David M. Hougaard, Merete Nordentoft, Ole Mors, Preben Bo Mortensen, Thomas Werge, Kristjar Skajaa. *Advisory Board:* Markus Nöthen, Michael Owen, Robert H. Yolken, Niels Plath, Jonathan Mill, Daniel Geschwind.

Affiliations for all consortium members and acknowledgements for specific cohorts are provided in the Supplement.

## **Disclosures**

All authors declare that they have no conflicts of interest. JG is on the scientific advisory board for and has equity in Cala Health; and TLP is an employee of Concert Pharmaceuticals.

However, these affiliations are unrelated to this study. JWS is an unpaid member of the Bipolar/Depression Research Community Advisory Panel of 23andMe.



# References

1. Salk RH, Hyde JS, Abramson LY (2017): Gender differences in depression in representative national samples: Meta-analyses of diagnoses and symptoms. *Psychol Bull.* 143:783-822.
2. Jongsma HE, Turner C, Kirkbride JB, Jones PB (2019): International incidence of psychotic disorders, 2002-17: a systematic review and meta-analysis. *Lancet Public Health.* 4:e229-e244.
3. Diflorio A, Jones I (2010): Is sex important? Gender differences in bipolar disorder. *Int Rev Psychiatry.* 22:437-452.
4. Erol A, Winham SJ, McElroy SL, Frye MA, Prieto ML, Cuellar-Barboza AB, et al. (2015): Sex differences in the risk of rapid cycling and other indicators of adverse illness course in patients with bipolar I and II disorder. *Bipolar Disord.* 17:670-676.
5. Falkenburg J, Tracy DK (2014): Sex and schizophrenia: a review of gender differences. *Psychosis.* 6:61-69.
6. Leung A, Chue P (2000): Sex differences in schizophrenia, a review of the literature. *Acta Psychiatr Scand Suppl.* 401:3-38.
7. Schuch JJ, Roest AM, Nolen WA, Penninx BW, de Jonge P (2014): Gender differences in major depressive disorder: results from the Netherlands study of depression and anxiety. *J Affect Disord.* 156:156-163.
8. Mareckova K, Holsen L, Admon R, Whitfield-Gabrieli S, Seidman LJ, Buka SL, et al. (2017): Neural - hormonal responses to negative affective stimuli: Impact of dysphoric mood and sex. *J Affect Disord.* 222:88-97.
9. Mareckova K, Holsen LM, Admon R, Makris N, Seidman L, Buka S, et al. (2016): Brain activity and connectivity in response to negative affective stimuli: Impact of dysphoric mood and sex across diagnoses. *Hum Brain Mapp.* 37:3733-3744.
10. Polderman TJ, Benyamin B, de Leeuw CA, Sullivan PF, van Bochoven A, Visscher PM, et al. (2015): Meta-analysis of the heritability of human traits based on fifty years of twin studies. *Nat Genet.* 47:702-709.
11. Vink JM, Bartels M, van Beijsterveldt TC, van Dongen J, van Beek JH, Distel MA, et al. (2012): Sex differences in genetic architecture of complex phenotypes? *PLoS One.* 7:e47371.
12. Stringer S, Polderman TJC, Posthuma D (2017): Majority of human traits do not show evidence for sex-specific genetic and environmental effects. *Sci Rep.* 7:8688.
13. Weiss LA, Pan L, Abney M, Ober C (2006): The sex-specific genetic architecture of quantitative traits in humans. *Nat Genet.* 38:218-222.
14. Yang J, Bakshi A, Zhu Z, Hemani G, Vinkhuyzen AA, Nolte IM, et al. (2015): Genome-wide genetic homogeneity between sexes and populations for human height and body mass index. *Hum Mol Genet.* 24:7445-7449.
15. Goldstein JM, Faraone SV, Chen WJ, Tsuang MT (1995): Genetic heterogeneity may in part explain sex differences in the familial risk for schizophrenia. *Biol Psychiatry.* 38:808-813.
16. Goldstein JM, Cherkerzian S, Tsuang MT, Petryshen TL (2013): Sex differences in the genetic risk for schizophrenia: History of the evidence for sex-specific and sex-dependent effects. *Am J Med Genet B Neuropsychiatr Genet.* 162B:698-710.
17. Goldstein JM (1997): Sex differences in schizophrenia: epidemiology, genetics and the brain. *Int Rev Psychiatr.* 9:399-408.
18. Goldstein JM, Seidman LJ, O'Brien LM, Horton NJ, Kennedy DN, Makris N, et al. (2002): Impact of normal sexual dimorphisms on sex differences in structural brain abnormalities in schizophrenia assessed by magnetic resonance imaging. *Arch Gen Psychiatry.* 59:154-164.
19. Sekar A, Bialas AR, de Rivera H, Davis A, Hammond TR, Kamitaki N, et al. (2016): Schizophrenia risk from complex variation of complement component 4. *Nature.* 530:177-183.



20. Kamitaki N, Sekar A, Handsaker RE, Rivera Hd, Tooley K, Morris DL, et al. (2020): Complement genes contribute sex-biased vulnerability in diverse disorders. *Nature*.
21. Hyde CL, Nagle MW, Tian C, Chen X, Paciga SA, Wendland JR, et al. (2016): Identification of 15 genetic loci associated with risk of major depression in individuals of European descent. *Nat Genet*. 48:1031-1036.
22. Major Depressive Disorder Working Group of the Psychiatric GWAS Consortium, Ripke S, Wray NR, Lewis CM, Hamilton SP, Weissman MM, et al. (2013): A mega-analysis of genome-wide association studies for major depressive disorder. *Mol Psychiatry*. 18:497-511.
23. Wray NR, Pergadia ML, Blackwood DH, Penninx BW, Gordon SD, Nyholt DR, et al. (2012): Genome-wide association study of major depressive disorder: new results, meta-analysis, and lessons learned. *Mol Psychiatry*. 17:36-48.
24. Wray NR, Ripke S, Mattheisen M, Trzaskowski M, Byrne EM, Abdellaoui A, et al. (2018): Genome-wide association analyses identify 44 risk variants and refine the genetic architecture of major depression. *Nat Genet*. 50:668-681.
25. Bertschy G, Velten M, Weibel S (2016): Major depression: does gender influence the risk of recurrence? A systematic review. *Eur J Psychiatr*. 30:7-27.
26. Smith DJ, Nicholl BI, Cullen B, Martin D, Ul-Haq Z, Evans J, et al. (2013): Prevalence and characteristics of probable major depression and bipolar disorder within UK biobank: cross-sectional study of 172,751 participants. *PLoS One*. 8:e75362.
27. van Loo HM, Aggen SH, Gardner CO, Kendler KS (2018): Sex similarities and differences in risk factors for recurrence of major depression. *Psychol Med*. 48:1685-1693.
28. Duncan LE, Ratanatharathorn A, Aiello AE, Almli LM, Amstadter AB, Ashley-Koch AE, et al. (2018): Largest GWAS of PTSD (N=20 070) yields genetic overlap with schizophrenia and sex differences in heritability. *Mol Psychiatry*. 23:666-673.
29. Nievergelt CM, Maihofer AX, Klengel T, Atkinson EG, Chen CY, Choi KW, et al. (2019): International meta-analysis of PTSD genome-wide association studies identifies sex- and ancestry-specific genetic risk loci. *Nat Commun*. 10:4558.
30. Mitra I, Tsang K, Ladd-Acosta C, Croen LA, Aldinger KA, Hendren RL, et al. (2016): Pleiotropic Mechanisms Indicated for Sex Differences in Autism. *PLoS Genet*. 12:e1006425.
31. Khramtsova EA, Heldman R, Derks EM, Yu D, Tourette Syndrome/Obsessive-Compulsive Disorder Working Group of the Psychiatric Genomics C, Davis LK, et al. (2018): Sex differences in the genetic architecture of obsessive-compulsive disorder. *Am J Med Genet B Neuropsychiatr Genet*.
32. Walters R, Abbott L, Bryant S, Churchhouse C, Palmer D, Neale B (2018): Heritability of >2,000 traits and disorders in the UK Biobank. <http://www.nealelab.is/uk-biobank/>.
33. Hübel C, Gaspar HA, Coleman JRI, Finucane H, Purves KL, Hanscombe KB, et al. (2018): Genomics of body fat percentage may contribute to sex bias in anorexia nervosa. *Am J Med Genet B Neuropsychiatr Genet*.
34. Trzaskowski M, Mehta D, Peyrot WJ, Hawkes D, Davies D, Howard DM, et al. (2019): Quantifying between-cohort and between-sex genetic heterogeneity in major depressive disorder. *Am J Med Genet B Neuropsychiatr Genet*. 180:439-447.
35. Martin J, Walters RK, Demontis D, Mattheisen M, Lee SH, Robinson E, et al. (2018): A Genetic Investigation of Sex Bias in the Prevalence of Attention-Deficit/Hyperactivity Disorder. *Biol Psychiatry*. 83:1044-1053.
36. Chen C-Y, Lopes-Ramos C, Kuijjer ML, Paulson JN, Sonawane AR, Fagny M, et al. (2016): Sexual dimorphism in gene expression and regulatory networks across human tissues. *BioRxiv*.
37. Rich-Edwards JW, Kaiser UB, Chen GL, Manson JE, Goldstein JM (2018): Sex and Gender Differences Research Design for Basic, Clinical, and Population Studies: Essentials for

Investigators. *Endocr Rev.* 39:424-439.

38. Psychiatric Genomics Consortium Schizophrenia Working Group (2014): Biological insights from 108 schizophrenia-associated genetic loci. *Nature.* 511:421-427.
39. Psychiatric GWAS Consortium Bipolar Disorder Working Group (2011): Large-scale genome-wide association analysis of bipolar disorder identifies a new susceptibility locus near ODZ4. *Nat Genet.* 43:977-983.
40. Pedersen CB, Bybjerg-Grauholm J, Pedersen MG, Grove J, Agerbo E, Baekvad-Hansen M, et al. (2018): The iPSYCH2012 case-cohort sample: new directions for unravelling genetic and environmental architectures of severe mental disorders. *Mol Psychiatry.* 23:6-14.
41. Purcell S, Neale B, Todd-Brown K, Thomas L, Ferreira MA, Bender D, et al. (2007): PLINK: A tool set for whole-genome association and population-based linkage analyses. *Am J Hum Genet.* 81:559-575.
42. Willer CJ, Li Y, Abecasis GR (2010): METAL: fast and efficient meta-analysis of genomewide association scans. *Bioinformatics.* 26:2190-2191.
43. Bulik-Sullivan BK, Loh PR, Finucane HK, Ripke S, Yang J, Schizophrenia Working Group of the Psychiatric Genomics C, et al. (2015): LD Score regression distinguishes confounding from polygenicity in genome-wide association studies. *Nat Genet.* 47:291-295.
44. Zheng J, Erzurumluoglu AM, Elsworth BL, Kemp JP, Howe L, Haycock PC, et al. (2017): LD Hub: a centralized database and web interface to perform LD score regression that maximizes the potential of summary level GWAS data for SNP heritability and genetic correlation analysis. *Bioinformatics.* 33:272-279.
45. Bhattacharjee S, Rajaraman P, Jacobs KB, Wheeler WA, Melin BS, Hartge P, et al. (2012): A subset-based approach improves power and interpretation for the combined analysis of genetic association studies of heterogeneous traits. *Am J Hum Genet.* 90:821-835.
46. Benner C, Spencer CC, Havulinna AS, Salomaa V, Ripatti S, Pirinen M (2016): FINEMAP: efficient variable selection using summary data from genome-wide association studies. *Bioinformatics.* 32:1493-1501.
47. Hormozdiari F, Kostem E, Kang EY, Pasaniuc B, Eskin E (2014): Identifying causal variants at loci with multiple signals of association. *Genetics.* 198:497-508.
48. de Leeuw CA, Mooij JM, Heskes T, Posthuma D (2015): MAGMA: generalized gene-set analysis of GWAS data. *PLoS computational biology.* 11:e1004219.
49. Network & Pathway Analysis Subgroup of Psychiatric Genomics Consortium (2015): Psychiatric genome-wide association study analyses implicate neuronal, immune and histone pathways. *Nat Neurosci.* 18:199-209.
50. Pardiñas AF, Holmans P, Pocklington AJ, Escott-Price V, Ripke S, Carrera N, et al. (2018): Common schizophrenia alleles are enriched in mutation-intolerant genes and in regions under strong background selection. *Nat Genet.*
51. Cross-Disorder Group of the Psychiatric Genomics Consortium. Electronic address pmhe, Cross-Disorder Group of the Psychiatric Genomics C (2019): Genomic Relationships, Novel Loci, and Pleiotropic Mechanisms across Eight Psychiatric Disorders. *Cell.* 179:1469-1482 e1411.
52. Martin J, Taylor MJ, Rydell M, Riglin L, Eyre O, Lu Y, et al. (2018): Sex-specific manifestation of genetic risk for attention deficit hyperactivity disorder in the general population. *J Child Psychol Psychiatry.* 59:908-916.
53. Gorokhova S, Bibert S, Geering K, Heintz N (2007): A novel family of transmembrane proteins interacting with beta subunits of the Na,K-ATPase. *Hum Mol Genet.* 16:2394-2410.
54. Davies G, Lam M, Harris SE, Trampush JW, Luciano M, Hill WD, et al. (2018): Study of 300,486 individuals identifies 148 independent genetic loci influencing general cognitive function. *Nat Commun.* 9:2098.

55. Aberg KA, Liu Y, Bukszar J, McClay JL, Khachane AN, Andreassen OA, et al. (2013): A comprehensive family-based replication study of schizophrenia genes. *JAMA Psychiatry*. 70:573-581.
56. Edwards AC, Bigdeli TB, Docherty AR, Bacanu S, Lee D, de Candia TR, et al. (2016): Meta-analysis of Positive and Negative Symptoms Reveals Schizophrenia Modifier Genes. *Schizophr Bull*. 42:279-287.
57. Peltola MA, Kuja-Panula J, Lauri SE, Taira T, Rauvala H (2011): AMIGO is an auxiliary subunit of the Kv2.1 potassium channel. *EMBO Rep*. 12:1293-1299.
58. Bishop HI, Cobb MM, Kirmiz M, Parajuli LK, Mandikian D, Philp AM, et al. (2018): Kv2 Ion Channels Determine the Expression and Localization of the Associated AMIGO-1 Cell Adhesion Molecule in Adult Brain Neurons. *Front Mol Neurosci*. 11:1.
59. He CW, Liao CP, Pan CL (2018): Wnt signalling in the development of axon, dendrites and synapses. *Open Biol*. 8.
60. Bem J, Brozko N, Chakraborty C, Lipiec MA, Kozinski K, Nagalski A, et al. (2019): Wnt/beta-catenin signaling in brain development and mental disorders: keeping TCF7L2 in mind. *FEBS Lett*. 593:1654-1674.
61. Hennig KM, Fass DM, Zhao WN, Sheridan SD, Fu T, Erdin S, et al. (2017): WNT/beta-Catenin Pathway and Epigenetic Mechanisms Regulate the Pitt-Hopkins Syndrome and Schizophrenia Risk Gene TCF4. *Mol Neuropsychiatry*. 3:53-71.
62. Hoseth EZ, Krull F, Dieset I, Morch RH, Hope S, Gardsjord ES, et al. (2018): Exploring the Wnt signaling pathway in schizophrenia and bipolar disorder. *Transl Psychiatry*. 8:55.
63. Yu Z, Lin D, Zhong Y, Luo B, Liu S, Fei E, et al. (2019): Transmembrane protein 108 involves in adult neurogenesis in the hippocampal dentate gyrus. *Cell Biosci*. 9:9.
64. O'Brien HE, Hannon E, Jeffries AR, Davies W, Hill MJ, Anney RJ, et al. (2018): Sex differences in gene expression in the human fetal brain. *bioRxiv*.
65. McClellan KM, Stratton MS, Tobet SA (2010): Roles for gamma-aminobutyric acid in the development of the paraventricular nucleus of the hypothalamus. *J Comp Neurol*. 518:2710-2728.
66. Mersha TB, Martin LJ, Biagini Myers JM, Kovacic MB, He H, Lindsey M, et al. (2015): Genomic architecture of asthma differs by sex. *Genomics*. 106:15-22.
67. Seney ML, Huo Z, Cahill K, French L, Puralewski R, Zhang J, et al. (2018): Opposite Molecular Signatures of Depression in Men and Women. *Biol Psychiatry*. 84:18-27.
68. Labonté B, Engmann O, Purushothaman I, Menard C, Wang J, Tan C, et al. (2017): Sex-specific transcriptional signatures in human depression. *Nat Med*. 23:1102-1111.
69. Wang K, Baldassano R, Zhang H, Qu HQ, Imielinski M, Kugathasan S, et al. (2010): Comparative genetic analysis of inflammatory bowel disease and type 1 diabetes implicates multiple loci with opposite effects. *Hum Mol Genet*. 19:2059-2067.
70. Byars SG, Stearns SC, Boomsma JJ (2014): Opposite risk patterns for autism and schizophrenia are associated with normal variation in birth size: phenotypic support for hypothesized diametric gene-dosage effects. *Proc Biol Sci*. 281:20140604.
71. Crespi B, Badcock C (2008): Psychosis and autism as diametrical disorders of the social brain. *Behav Brain Sci*. 31:241-261; discussion 261-320.
72. Gilks WP, Abbott JK, Morrow EH (2014): Sex differences in disease genetics: evidence, evolution, and detection. *Trends Genet*. 30:453-463.
73. Taneja V (2018): Sex Hormones Determine Immune Response. *Front Immunol*. 9:1931.
74. Lotter H, Altfeld M (2019): Sex differences in immunity. *Semin Immunopathol*. 41:133-135.
75. Hochgreb-Hägele T, Koo DE, Bronner ME (2015): Znf385C mediates a novel p53-dependent transcriptional switch to control timing of facial bone formation. *Dev Biol*. 400:23-32.

76. Buniello A, MacArthur JAL, Cerezo M, Harris LW, Hayhurst J, Malangone C, et al. (2019): The NHGRI-EBI GWAS Catalog of published genome-wide association studies, targeted arrays and summary statistics 2019. *Nucleic Acids Res.* 47:D1005-D1012.
77. Fishilevich S, Nudel R, Rappaport N, Hadar R, Plaschkes I, Iny Stein T, et al. (2017): GeneHancer: genome-wide integration of enhancers and target genes in GeneCards. *Database (Oxford)*. 2017.
78. Savage JE, Jansen PR, Stringer S, Watanabe K, Bryois J, de Leeuw CA, et al. (2018): Genome-wide association meta-analysis in 269,867 individuals identifies new genetic and functional links to intelligence. *Nat Genet.* 50:912-919.
79. Lee JJ, Wedow R, Okbay A, Kong E, Maghzian O, Zacher M, et al. (2018): Gene discovery and polygenic prediction from a genome-wide association study of educational attainment in 1.1 million individuals. *Nat Genet.* 50:1112-1121.
80. Howard DM, Adams MJ, Shirali M, Clarke TK, Marioni RE, Davies G, et al. (2018): Genome-wide association study of depression phenotypes in UK Biobank identifies variants in excitatory synaptic pathways. *Nat Commun.* 9:1470.
81. Ziats MN, Rennert OM (2013): Sex-biased gene expression in the developing brain: implications for autism spectrum disorders. *Mol Autism.* 4:10.
82. McCarthy MM (2019): Sex differences in neuroimmunity as an inherent risk factor. *Neuropsychopharmacology.* 44:38-44.
83. Sellgren CM, Gracias J, Jungholm O, Perlis RH, Engberg G, Schwieler L, et al. (2019): Peripheral and central levels of kynurenic acid in bipolar disorder subjects and healthy controls. *Transl Psychiatry.* 9:37.
84. Nilsson LK, Linderholm KR, Engberg G, Paulson L, Blennow K, Lindstrom LH, et al. (2005): Elevated levels of kynurenic acid in the cerebrospinal fluid of male patients with schizophrenia. *Schizophr Res.* 80:315-322.
85. Miller CL, Llenos IC, Dulay JR, Weis S (2006): Upregulation of the initiating step of the kynurenine pathway in postmortem anterior cingulate cortex from individuals with schizophrenia and bipolar disorder. *Brain Res.* 1073-1074:25-37.
86. Sathyaikumar KV, Stachowski EK, Wonodi I, Roberts RC, Rassoulpour A, McMahon RP, et al. (2011): Impaired kynurenine pathway metabolism in the prefrontal cortex of individuals with schizophrenia. *Schizophr Bull.* 37:1147-1156.
87. Kindler J, Lim CK, Weickert CS, Boerrigter D, Galletly C, Liu D, et al. (2019): Dysregulation of kynurenine metabolism is related to proinflammatory cytokines, attention, and prefrontal cortex volume in schizophrenia. *Mol Psychiatry.*
88. Strasser B, Becker K, Fuchs D, Gostner JM (2017): Kynurenine pathway metabolism and immune activation: Peripheral measurements in psychiatric and co-morbid conditions. *Neuropharmacology.* 112:286-296.
89. Ortona E, Pierdominici M, Rider V (2019): Sex Hormones and Gender Differences in Immune Responses. *Front Immunol*, pp 186.
90. Goldstein JM, Hale T, Foster SL, Tobet SA, Handa RJ (2019): Sex differences in major depression and comorbidity of cardiometabolic disorders: impact of prenatal stress and immune exposures. *Neuropsychopharmacology.* 44:59-70.
91. Malamitsi-Puchner A, Tziotis J, Tsonou A, Protonotariou E, Sarandakou A, Creatsas G (2000): Changes in serum levels of vascular endothelial growth factor in males and females throughout life. *J Soc Gynecol Investig.* 7:309-312.
92. Mahoney ER, Dumitrescu L, Moore AM, Cambronero FE, De Jager PL, Koran MEI, et al. (2019): Brain expression of the vascular endothelial growth factor gene family in cognitive aging and alzheimer's disease. *Mol Psychiatry.*
93. Frahm KA, Schow MJ, Tobet SA (2012): The vasculature within the paraventricular



nucleus of the hypothalamus in mice varies as a function of development, subnuclear location, and GABA signaling. *Horm Metab Res.* 44:619-624.

94. Frahm KA, Handa RJ, Tobet SA (2018): Embryonic Exposure to Dexamethasone Affects Nonneuronal Cells in the Adult Paraventricular Nucleus of the Hypothalamus. *J Endocr Soc.* 2:140-153.

95. Mayne BT, Bianco-Miotto T, Buckberry S, Breen J, Clifton V, Shoubridge C, et al. (2016): Large Scale Gene Expression Meta-Analysis Reveals Tissue-Specific, Sex-Biased Gene Expression in Humans. *Front Genet.* 7:183.

96. Shi L, Zhang Z, Su B (2016): Sex biased gene expression profiling of human brains at major developmental stages. *Sci Rep.* 6:21181.

97. Lopes-Ramos CM, Chen CY, Kuijjer ML, Paulson JN, Sonawane AR, Fagny M, et al. (2020): Sex Differences in Gene Expression and Regulatory Networks across 29 Human Tissues. *Cell Rep.* 31:107795.

98. Jansen R, Batista S, Brooks AI, Tischfield JA, Willemsen G, van Grootheest G, et al. (2014): Sex differences in the human peripheral blood transcriptome. *BMC Genomics.* 15:33.

99. van Dongen J, Nivard MG, Willemsen G, Hottenga JJ, Helmer Q, Dolan CV, et al. (2016): Genetic and environmental influences interact with age and sex in shaping the human methylome. *Nat Commun.* 7:11115.

100. Pirastu N, Cordioli M, Nandakumar P, Mignogna G, Abdellaoui A, Hollis B, et al. (2020): Genetic analyses identify widespread sex-differential participation bias. *bioRxiv.*

101. Tukiainen T, Villani AC, Yen A, Rivas MA, Marshall JL, Satija R, et al. (2017): Landscape of X chromosome inactivation across human tissues. *Nature.* 550:244-248.

## Figure Legends

**Figure 1.** LD Score Regression estimates of SNP-based **(a)** heritability,  $h^2(\pm SE)$ , and **(b)** genetic correlations,  $r_g$  (SE).

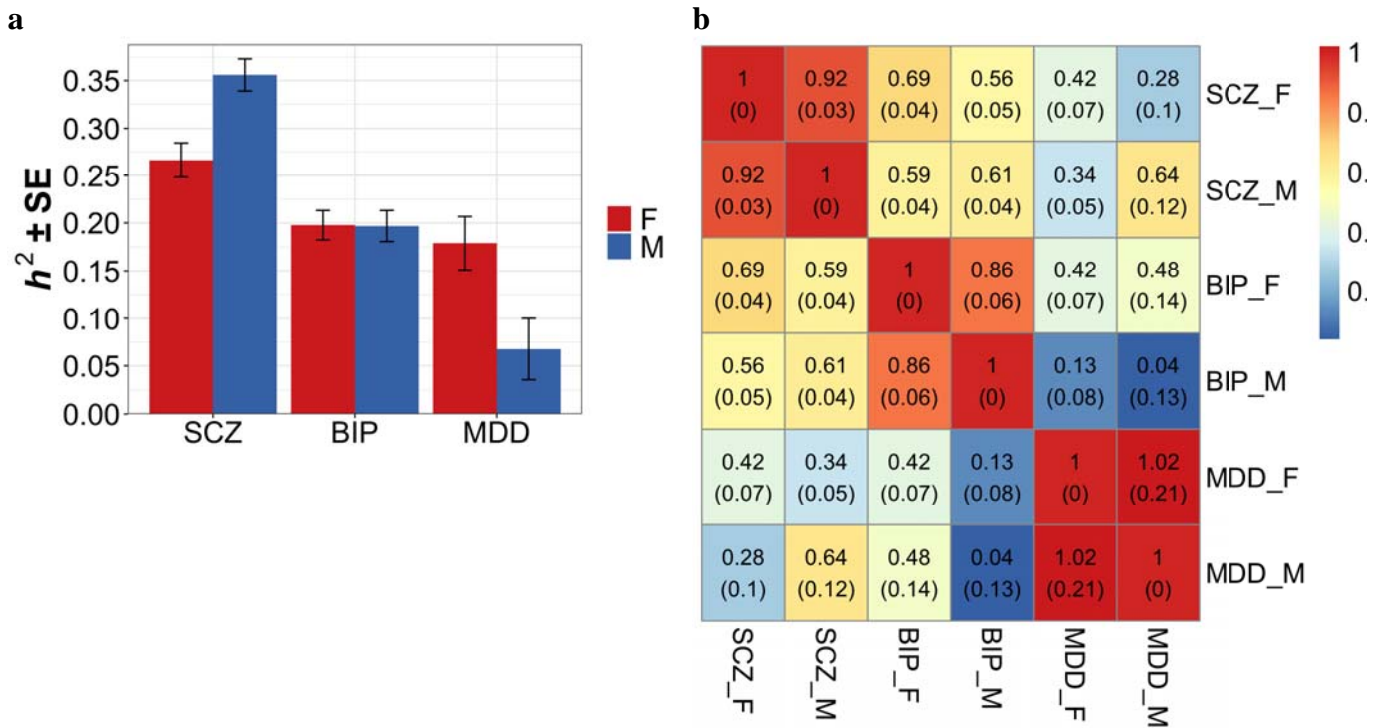

**Figure 2.** Cross-disorder Manhatten plot of SNP-by-sex interaction p-values (**a**) and locus zoom plot for the NKAIN2 locus exhibiting a significant SNP-by-sex interaction effect on cross-disorder risk (**b**).

**a**

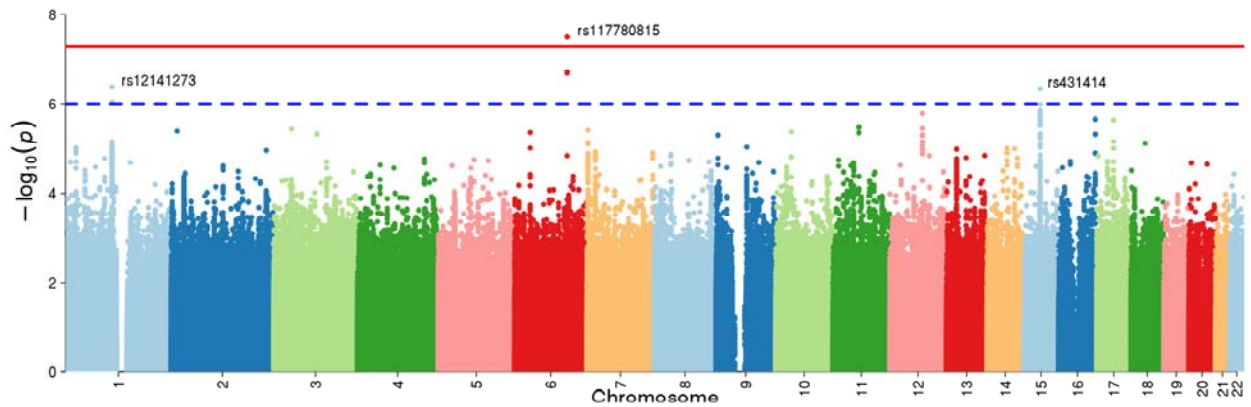

**b**

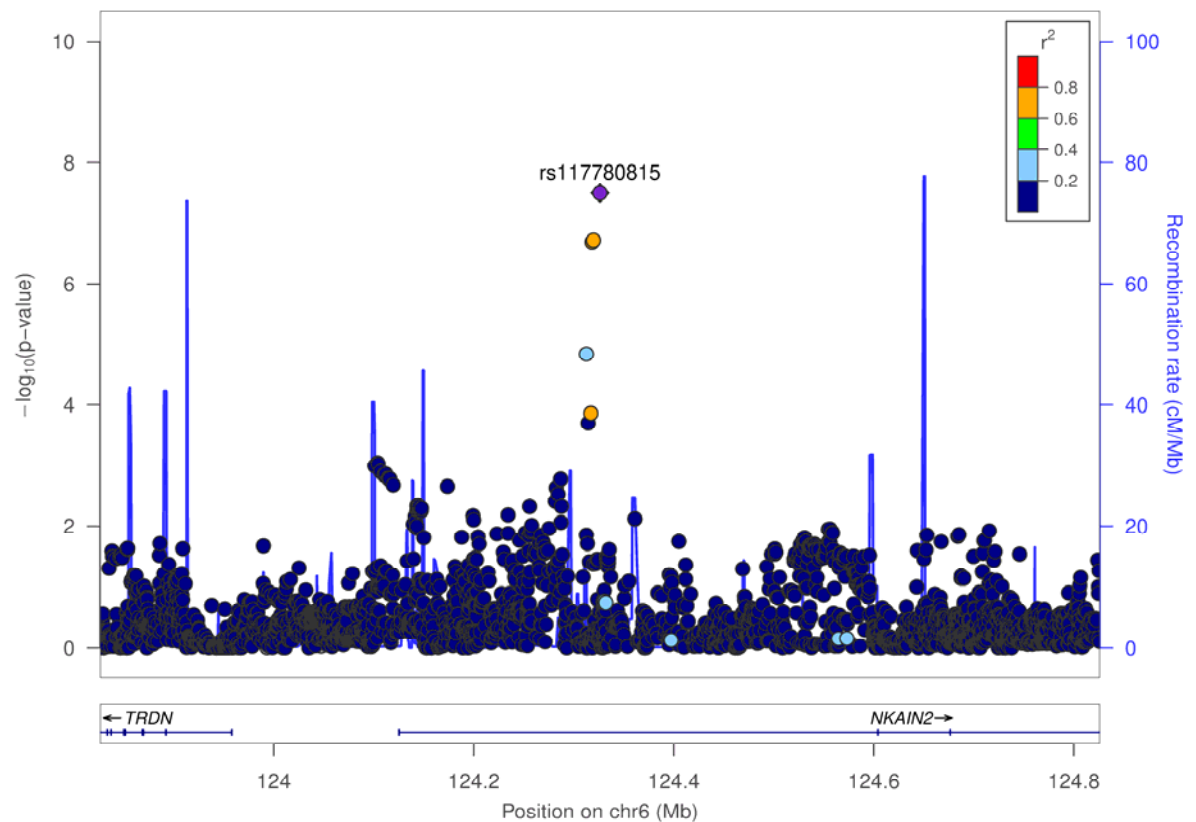

# Table Legends

**Table 1.** Cross-Disorder Omnibus tests.

Listed are SNPs with cross-disorder interaction  $p$ -values  $< 1 \times 10^{-6}$ . Loci were clumped using ‘plink --bfile 1kgp\_ref\_file --clump asset\_output --clump-p1 1e-4 --clump-p2 1e-4 --clump-r2 0.6 --clump-kb 3000’

Abbreviations: SNP, Variant ID; A1/A2, Allele 1 (reference allele)/Allele 2; CHR, Chromosome; BP, Base Pair Position; P, Omnibus  $p$ -value in combined PGC+iPSYCH datasets; Pheno.1, Phenotype(s) associated in direction 1; Pheno.2, Phenotype(s) associated in direction 2; P.1, Phenotype(s) 1  $p$ -value; P.2, Phenotype(s) 2  $p$ -value; OR.1 (CI), Phenotype(s) 1 Odds Ratio (Confidence Interval); OR.2 (CI), Phenotype(s) 2 Odds Ratio (Confidence Interval); Meta.Pvalue, Basic Meta-Analysis  $P$  value; Meta.OR (CI), Basic Meta-Analysis Odds Ratio (Confidence Interval)

**Table 2.** Single-disorder and Cross-disorder Autosomal SNP-by-sex interaction results.

Listed are SNPs with interaction  $p$ -values  $< 1 \times 10^{-6}$  in SCZ, BIP, (r)MDD, and cross-disorder. Loci were clumped using ‘plink --bfile 1kgp\_ref\_file --clump metal\_output --clump-p1 1e-4 --clump-p2 1e-4 --clump-r2 0.6 --clump-kb 3000’

Abbreviations: SNP, Variant rs ID;  $P_{G \times S}$ ,  $p$ -value for  $G \times S$  interaction in combined PGC + iPSYCH datasets; CHR, Chromosome; BP, Base Pair Position; A1/A2, Allele 1/Allele 2; Freq1, Frequency of Allele 1; MAF, Minor Allele Frequency;  $Beta_{G \times S}$ , Beta (Standard Error) for  $G \times S$  interaction;  $Beta_F$  (SE), Beta (Standard Error) for female-stratified association;  $P_F$ ,  $p$ -value for female-stratified association;  $Beta_M$ , Beta (Standard Error) for male-stratified association;  $P_M$ ,  $p$ -value for male-stratified association;  $Z_{FM}$ , Z-score heterogeneity females-males;  $P_{FM}$ ,  $p$ -value heterogeneity females-males



**Table 1.** Cross-Disorder Omnibus tests of SNP-by-sex interactions

| SNP                                         | CHR | BP        | A1/<br>A2 | MAF   | Compartment | Gene<br>(Distance in<br>kb)      | P        | Pheno.1  | Pheno.2 | P.1      | P.2      | OR.1<br>(CI)        | OR.2<br>(CI)         | Meta P   | Meta OR<br>(CI)      |
|---------------------------------------------|-----|-----------|-----------|-------|-------------|----------------------------------|----------|----------|---------|----------|----------|---------------------|----------------------|----------|----------------------|
| <b>SCZ-BIP-MDD (European only)</b>          |     |           |           |       |             |                                  |          |          |         |          |          |                     |                      |          |                      |
| rs117780815                                 | 6   | 124326227 | T/A       | 0.036 | intronic    | NKAIN2                           | 3.19E-08 | BIP      | SCZ     | 1.34E-07 | 1.12E-02 | 2.0<br>(1.52, 2.51) | 0.79<br>(0.65, 0.95) | 8.10E-02 | 1.12<br>(1.11, 1.13) |
| rs12141273                                  | 1   | 110079143 | A/G       | 0.067 | intergenic  | AMIGO1<br>(26.8);<br>GPR61 (3.3) | 4.16E-07 | BIP      | MDD     | 1.60E-04 | 1.40E-04 | 1.3<br>(1.14, 1.50) | 0.81<br>(0.73, 0.90) | 2.03E-01 | 0.96<br>(0.95, 0.96) |
| rs431414                                    | 15  | 59147800  | T/C       | 0.181 | UTR3        | MINDY2                           | 4.60E-07 | SCZ      | BIP     | 1.62E-07 | 1.53E-01 | 1.2<br>(1.14, 1.34) | 0.91<br>(0.80, 1.04) | 1.67E-02 | 1.07<br>(1.07, 1.07) |
| <b>SCZ-BIP-MDD (European + East Asian)</b>  |     |           |           |       |             |                                  |          |          |         |          |          |                     |                      |          |                      |
| rs117780815                                 | 6   | 124326227 | T/A       | 0.036 | intronic    | NKAIN2                           | 2.84E-08 | BIP      | SCZ     | 1.34E-07 | 9.89E-03 | 2.0<br>(1.52, 2.51) | 0.79<br>(0.65, 0.94) | 9.46E-02 | 1.11<br>(1.10, 1.12) |
| rs12141273                                  | 1   | 110079143 | A/G       | 0.067 | intergenic  | AMIGO1<br>(26.8);<br>GPR61 (3.3) | 4.16E-07 | BIP      | MDD     | 1.60E-04 | 1.40E-04 | 1.3<br>(1.14, 1.50) | 0.81<br>(0.73, 0.90) | 2.03E-01 | 0.96<br>(0.95, 0.96) |
| rs35477914                                  | 15  | 59197669  | T/A       | 0.193 | intronic    | SLTM                             | 8.54E-07 | BIP; MDD | SCZ     | 0.01329  | 3.60E-06 | 1.1<br>(1.01, 1.14) | 0.86<br>(0.80, 0.92) | 4.84E-01 | 0.99<br>(0.98, 0.99) |
| <b>SCZ-BIP-rMDD (European only)</b>         |     |           |           |       |             |                                  |          |          |         |          |          |                     |                      |          |                      |
| rs117780815                                 | 6   | 124326227 | T/A       | 0.036 | intronic    | NKAIN2                           | 3.17E-08 | BIP      | SCZ     | 1.33E-07 | 1.12E-02 | 2.0<br>(1.52, 2.51) | 0.79<br>(0.65, 0.95) | 1.58E-01 | 1.10<br>(1.09, 1.11) |
| rs431414                                    | 15  | 59147800  | T/C       | 0.182 | UTR3        | MINDY2                           | 4.58E-07 | SCZ      | BIP     | 1.62E-07 | 1.53E-01 | 1.2<br>(1.14, 1.34) | 0.91<br>(0.80, 1.04) | 7.27E-03 | 1.08<br>(1.08, 1.09) |
| <b>SCZ-BIP-rMDD (European + East Asian)</b> |     |           |           |       |             |                                  |          |          |         |          |          |                     |                      |          |                      |
| rs117780815                                 | 6   | 124326227 | T/A       | 0.036 | intronic    | NKAIN2                           | 2.82E-08 | BIP      | SCZ     | 1.33E-07 | 9.88E-03 | 2.0<br>(1.52, 2.51) | 0.79<br>(0.65, 0.94) | 1.81E-01 | 1.10<br>(1.09, 1.11) |

**Table 2.** Single-disorder and Cross-disorder Autosomal SNP-by-sex interaction results.

| SNP                                                        | CHR | BP        | A1/<br>A2 | Freq1<br>MAF | Compartment | Gene<br>(Distance in kb)             | N Cases<br>(%Female) | N Controls<br>(%Female) | Beta <sub>GxS</sub><br>(SE) | P <sub>GxS</sub> | Beta <sub>F</sub><br>(SE) | P <sub>F</sub> | Beta <sub>M</sub><br>(SE) | P <sub>M</sub> | Z <sub>FM</sub> | P <sub>FM</sub> |
|------------------------------------------------------------|-----|-----------|-----------|--------------|-------------|--------------------------------------|----------------------|-------------------------|-----------------------------|------------------|---------------------------|----------------|---------------------------|----------------|-----------------|-----------------|
| <b>Cross-Disorder SCZ-BIP-MDD (European only)</b>          |     |           |           |              |             |                                      |                      |                         |                             |                  |                           |                |                           |                |                 |                 |
| rs7302529                                                  | 12  | 77321581  | T/C       | 0.26<br>0.26 | intergenic  | CSRP2 (48.8); E2F7 (93.4)            | 34,638<br>(51.36%)   | 34,696<br>(50.15%)      | 0.145<br>(0.028)            | 1.60E-7          | 0.087<br>(0.019)          | 5.09E-6        | -0.051<br>(0.020)         | 1.15E-2        | 4.98            | 6.51E-7         |
| rs73033497                                                 | 7   | 2910659   | A/T       | 0.86<br>0.14 | intergenic  | GNA12 (26.7); CARD11 (35.0)          | 14,916<br>(49.21%)   | 17,547<br>(47.81%)      | 0.246<br>(0.050)            | 8.82E-7          | 0.116<br>(0.036)          | 1.09E-3        | -0.128<br>(0.035)         | 2.69E-4        | 4.89            | 1.03E-6         |
| <b>Cross-Disorder SCZ-BIP-MDD (European + East Asian)</b>  |     |           |           |              |             |                                      |                      |                         |                             |                  |                           |                |                           |                |                 |                 |
| rs7914279                                                  | 10  | 122161890 | T/G       | 0.89<br>0.11 | intergenic  | MIR4682 (44.3); PLPP4 (54.6)         | 78,640<br>(49.95%)   | 71,790<br>(49.70%)      | 0.146<br>(0.029)            | 6.39E-7          | 0.064<br>(0.020)          | 1.86E-3        | -0.077<br>(0.021)         | 2.27E-4        | 4.82            | 1.43E-6         |
| rs73033497                                                 | 7   | 2910659   | A/T       | 0.86<br>0.14 | intergenic  | GNA12 (26.7); CARD11 (35.0)          | 14,916<br>(49.21%)   | 17,547<br>(47.81%)      | 0.246<br>(0.050)            | 8.82E-7          | 0.116<br>(0.036)          | 1.09E-3        | -0.128<br>(0.035)         | 2.69E-4        | 4.89            | 1.03E-6         |
| rs7302529                                                  | 12  | 77321581  | T/C       | 0.25<br>0.25 | intergenic  | CSRP2 (48.8); E2F7 (93.4)            | 35,114<br>(50.69%)   | 36,707<br>(50.72%)      | 0.133<br>(0.027)            | 9.37E-7          | 0.082<br>(0.019)          | 1.35E-5        | -0.044<br>(0.020)         | 2.37E-2        | 4.64            | 3.51E-6         |
| <b>Cross-Disorder SCZ-BIP-rMDD (European only)</b>         |     |           |           |              |             |                                      |                      |                         |                             |                  |                           |                |                           |                |                 |                 |
| rs73033497                                                 | 7   | 2910659   | A/T       | 0.86<br>0.14 | intergenic  | GNA12 (26.7); CARD11 (35.0)          | 13,497<br>(47.22%)   | 14,619<br>(48.26%)      | 0.267<br>(0.054)            | 6.22E-7          | 0.142<br>(0.039)          | 2.55E-4        | -0.129<br>(0.037)         | 4.89E-4        | 5.05            | 4.37E-7         |
| rs7302529                                                  | 12  | 77321581  | T/C       | 0.26<br>0.26 | intergenic  | CSRP2 (48.8); E2F7 (93.4)            | 31,541<br>(49.75%)   | 31,377<br>(50.42%)      | 0.144<br>(0.029)            | 7.43E-7          | 0.094<br>(0.020)          | 4.48E-6        | -0.048<br>(0.021)         | 2.13E-2        | 4.86            | 1.18E-6         |
| <b>Cross-Disorder SCZ-BIP-rMDD (European + East Asian)</b> |     |           |           |              |             |                                      |                      |                         |                             |                  |                           |                |                           |                |                 |                 |
| rs8040598                                                  | 15  | 71857368  | A/G       | 0.86<br>0.14 | intronic    | THSD4                                | 41,001<br>(45.92%)   | 43,732<br>(50.94%)      | 0.183<br>(0.036)            | 3.90E-7          | 0.084<br>(0.026)          | 1.18E-3        | -0.093<br>(0.025)         | 2.18E-4        | 4.89            | 9.90E-7         |
| rs73033497                                                 | 7   | 2910659   | A/T       | 0.86<br>0.14 | intergenic  | GNA12 (26.7); CARD11 (35.0)          | 13,497<br>(47.22%)   | 14,619<br>(48.26%)      | 0.267<br>(0.054)            | 6.22E-7          | 0.142<br>(0.039)          | 2.55E-4        | -0.129<br>(0.037)         | 4.89E-4        | 5.05            | 4.37E-7         |
| <b>Schizophrenia (European only)</b>                       |     |           |           |              |             |                                      |                      |                         |                             |                  |                           |                |                           |                |                 |                 |
| rs11665282                                                 | 18  | 33767479  | A/G       | 0.69<br>0.31 | UTR5        | MOCOS                                | 21,581<br>(35.18%)   | 24,250<br>(48.62%)      | -0.156<br>(0.030)           | 1.48E-7          | -0.081<br>(0.023)         | 3.98E-4        | 0.072<br>(0.019)          | 2.16E-4        | -5.09           | 3.50E-7         |
| rs12445424                                                 | 16  | 87063374  | A/G       | 0.26<br>0.26 | intergenic  | LINC02188 (291.9); LINC02181 (280.2) | 29,467<br>(36.04%)   | 34,519<br>(48.33%)      | 0.140<br>(0.028)            | 3.52E-7          | 0.097<br>(0.021)          | 5.80E-6        | -0.050<br>(0.018)         | 4.67E-3        | 5.30            | 1.19E-7         |
| <b>Schizophrenia (European + East Asian)</b>               |     |           |           |              |             |                                      |                      |                         |                             |                  |                           |                |                           |                |                 |                 |
| rs11665282                                                 | 18  | 33767479  | A/G       | 0.69<br>0.31 | UTR5        | MOCOS                                | 22,060<br>(35.39%)   | 24,674<br>(48.26%)      | -0.149<br>(0.03)            | 3.74E-7          | -0.077<br>(0.023)         | 6.74E-4        | 0.070<br>(0.019)          | 2.53E-4        | -4.96           | 6.89E-7         |
| <b>Bipolar Disorder</b>                                    |     |           |           |              |             |                                      |                      |                         |                             |                  |                           |                |                           |                |                 |                 |
| rs12341335                                                 | 9   | 25649145  | T/C       | 0.90<br>0.10 | intergenic  | TUSC1 (27.2)                         | 7,730<br>(57.72%)    | 13,635<br>(51.28%)      | 0.373<br>(0.072)            | 2.29E-7          | 0.176<br>(0.048)          | 2.59E-4        | -0.201<br>(0.054)         | 2.11E-4        | 5.20            | 2.03E-7         |
| rs17651437                                                 | 2   | 106055684 | T/C       | 0.52<br>0.48 | upstream    | FHL2                                 | 16,365<br>(60.18%)   | 28,140<br>(50.75%)      | 0.155<br>(0.031)            | 3.72E-7          | 0.079<br>(0.020)          | 9.97E-5        | -0.069<br>(0.023)         | 3.08E-3        | 4.79            | 1.63E-6         |
| <b>Major Depressive Disorder</b>                           |     |           |           |              |             |                                      |                      |                         |                             |                  |                           |                |                           |                |                 |                 |
| rs9428240                                                  | 1   | 118831676 | T/C       | 0.59<br>0.41 | intergenic  | SPAG17 (103.8)                       | 14,232<br>(68.63%)   | 21,846<br>(50.63%)      | -0.181<br>(0.035)           | 1.64E-7          | -0.087<br>(0.022)         | 6.41E-5        | 0.094<br>(0.028)          | 8.41E-4        | -5.08           | 3.70E-7         |
| rs147515485                                                | 17  | 40182099  | T/C       | 0.02<br>0.02 | intronic    | ZNF385C                              | 31,149<br>(61.17%)   | 35,385<br>(50.89%)      | -0.472<br>(0.094)           | 4.61E-7          | -0.190<br>(0.060)         | 1.55E-3        | 0.303<br>(0.074)          | 4.39E-5        | -5.17           | 2.39E-7         |
| <b>Recurrent Major Depressive Disorder</b>                 |     |           |           |              |             |                                      |                      |                         |                             |                  |                           |                |                           |                |                 |                 |
| rs61138090                                                 | 1   | 118832069 | D/I2      | 0.59<br>0.41 | intergenic  | SPAG17 (104.2)                       | 7,685<br>(70.59%)    | 15,976<br>(51.71%)      | -0.240<br>(0.046)           | 1.40E-7          | -0.109<br>(0.028)         | 1.03E-4        | 0.142<br>(0.038)          | 2.08E-4        | -5.28           | 1.30E-7         |
